# Supplementary material for: Corticosteroids and risk of gastrointestinal bleeding: a systematic review and meta-analysis
Source: PubMed Central journal article supplement — BMJ Open. 2014 May 15;4(5):e004587. doi: 10.1136/bmjopen-2013-004587 (PMC4025450; doi:10.1136/bmjopen-2013-004587), 2014-05-15
Supplement: bmjopen-2013-004587.draft_revisions.pdf [file bmjopen-2013-004587.draft_revisions.pdf]

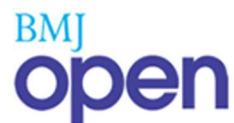

**Corticosteroids and risk of gastrointestinal bleeding: a systematic review and meta-analysis**

|                                 |                                                                                                                                                                                                                                                                                                                                  |
|---------------------------------|----------------------------------------------------------------------------------------------------------------------------------------------------------------------------------------------------------------------------------------------------------------------------------------------------------------------------------|
| Journal:                        | <i>BMJ Open</i>                                                                                                                                                                                                                                                                                                                  |
| Manuscript ID:                  | bmjopen-2013-004587                                                                                                                                                                                                                                                                                                              |
| Article Type:                   | Research                                                                                                                                                                                                                                                                                                                         |
| Date Submitted by the Author:   | 30-Nov-2013                                                                                                                                                                                                                                                                                                                      |
| Complete List of Authors:       | Narum, Sigrid; Diakonhjemmet Hospital, Center for Psychopharmacology; Oslo University Hospital, Department of Pharmacology<br>Westergren, Tone; Oslo University Hospital, Department of Pharmacology<br>Klemp, Marianne; Norwegian Knowledge Centre for the Health Services, ;<br>University of Oslo, Department of Pharmacology |
| <b>Primary Subject Heading</b>: | Gastroenterology and hepatology                                                                                                                                                                                                                                                                                                  |
| Secondary Subject Heading:      | Epidemiology, Evidence based practice, Intensive care                                                                                                                                                                                                                                                                            |
| Keywords:                       | Gastroenterology < INTERNAL MEDICINE, Adverse events < THERAPEUTICS, Clinical trials < THERAPEUTICS, CLINICAL PHARMACOLOGY, EPIDEMIOLOGY                                                                                                                                                                                         |
|                                 |                                                                                                                                                                                                                                                                                                                                  |

SCHOLARONE™  
Manuscripts

## Corticosteroids and risk of gastrointestinal bleeding: a systematic review and meta-analysis

Sigrid Narum,<sup>1</sup> Tone Westergren,<sup>2</sup> Marianne Klemp<sup>3</sup>

<sup>1</sup>Centre for Psychopharmacology, Diakonhjemmet Hospital, PO Box 85 Vinderen, N-0319 Oslo, Norway and Department of Pharmacology, Oslo University Hospital, Oslo, Norway.

<sup>2</sup>Regional Medicines Information & Pharmacovigilance Centre (RELIS), Department of Pharmacology, Oslo University Hospital, Oslo, Norway.

<sup>3</sup>Norwegian Knowledge Centre for the Health Services, Oslo, Norway and Department of Pharmacology, University of Oslo, Norway.

Correspondence to: S Narum [sigrid.narum@diakonsyk.no](mailto:sigrid.narum@diakonsyk.no), Contact address: Centre for Psychopharmacology, Diakonhjemmet Hospital, PO Box 85 Vinderen, N-0319 Oslo, Norway  
Telephone: +47 22 45 46 45

Key words: gastrointestinal haemorrhage, peptic ulcer perforation, glucocorticoids, pharmacovigilance, pharmacoepidemiology

Word count main text: 3010 words

## ABSTRACT

**Objective:** To assess whether corticosteroids are associated with increased risk of gastrointestinal adverse effects such as gastrointestinal bleeding or perforation.

**Design:** Systematic review and meta-analysis of randomised, double-blind, controlled trials comparing a corticosteroid to placebo for any medical condition or in healthy subjects. Studies with steroids given either locally, as single dose or in crossover studies were excluded.

**Data sources:** Literature search using Medline, Embase and Cochrane Database of Systematic Reviews between 1983 and 30<sup>th</sup> June 2011.

**Primary outcome measure:** Outcome measures were occurrence of gastrointestinal bleeding or perforation. Predefined subgroup analyses were done for disease severity, NSAID use, and history of peptic ulcer.

**Results:** 159 studies (N= 33 253) were included. In total, 840 (2.4%) patients had a gastrointestinal bleeding or perforation (2.9% and 2.0% for corticosteroids and placebo). Corticosteroids increased the risk of gastrointestinal bleeding or perforation by 30% (OR 1.32, 95% CI 1.15 to 1.51). The risk was increased for hospitalized patients (OR 1.37, 95% CI 1.18 to 1.59), but not for patients in ambulatory care (OR 1.03, 95% CI 0.70 to 1.50). Only 11 gastrointestinal bleeds or perforations occurred among 8 651 patients in ambulatory care (0.13%).

Increased risk was still present when studies with documented NSAID use were excluded (OR 1.31, 95% CI 1.13 to 1.53) and when studies describing peptic ulcer as exclusion criterion were excluded (OR 1.36, 95% CI 1.17 to 1.59).

**Conclusion:** Corticosteroid use was associated with increased risk of gastrointestinal bleeding and perforation. The increased risk was limited to hospitalized patients. For patients in ambulatory care, there was no increased risk of gastrointestinal bleeding or perforation and the total occurrence of bleeding or perforation was very low, indicating that acid-suppressive therapy is not necessary.

## ARTICLE SUMMARY

### Article focus

- The present systematic review aims to explore if systemic corticosteroids are associated with increased risk of gastrointestinal bleeding or perforation.

### Key messages

- The current study indicates that disease severity might influence the risk of gastrointestinal bleeding or perforation by corticosteroid use.
- Increased risk of gastrointestinal bleeding or perforation was limited to hospitalized patients. In contrast, patients in ambulatory care had no increased risk.

### Strengths and limitations of this study

- The strength of this systematic review is the size due to inclusion of a large number of randomized controlled trials that allowed for subgroup analyses.
- Limitations are the possible loss of relevant studies due to the selected search strategy, the quality of adverse event reporting in the primary research studies and the heterogeneity in the patient and treatment data.

## INTRODUCTION

The association between corticosteroid use and gastrointestinal adverse effects, including bleeding or perforation, has been a source of debate since the 1950s.<sup>1-3</sup> Since gastrointestinal bleeding and perforation are rare events, no single randomised controlled trials have been large enough to show any increased risk with the use of corticosteroids. Many observational studies have been performed to clarify whether corticosteroids do induce gastrointestinal bleeding, but there is still uncertainty whether this adverse effect is a result of the corticosteroid use, other medications, underlying disease or other causes.<sup>4-7</sup>

In databases and in product monographs for corticosteroids, peptic ulcer disease and gastrointestinal bleeding may or may not be described as possible adverse effects.<sup>8-13</sup> Though many gastroenterologists consider corticosteroids as not having ulcerogenic properties, a recent survey has shown that corticosteroids are still considered ulcerogenic by a majority of physicians and that a majority of practitioners would treat corticosteroid users with ulcer prophylaxis.<sup>14</sup> This uncertainty may have consequences for clinical recommendations and treatment guidelines, and is the main reason why we performed this systematic review.<sup>15-18</sup>

Gastrointestinal bleeding, bleeding peptic ulcer and perforation are feared complications of peptic ulcer disease, associated with considerable morbidity and mortality.<sup>19,20</sup> NSAID use and *Helicobacter pylori* infection are the most important risk factors for peptic ulcer disease. Bleeding or perforation is also seen as complications to stress ulcers among patients with critical illness in intensive care units. Gastrointestinal bleeding and perforation are assumed to occur when ulcers erode into underlying vessels. The mechanism by which corticosteroids

1  
2  
3 might induce gastrointestinal bleeding or perforation has not been established, but  
4 corticosteroids may impair tissue repair, leading to delayed wound healing.<sup>8</sup> In addition, the  
5 anti-inflammatory and analgesic properties of corticosteroids may mask symptoms of  
6 gastroduodenal ulcers and ulcer complications and thus possibly delay diagnosis.  
7

8  
9 The aim of this systematic review was to examine whether use of systemic corticosteroids  
10 was associated with increased risk of peptic ulcer complications such as gastrointestinal  
11 bleeding or perforation. Since observational studies have not been conclusive, we have  
12 chosen to include studies with a randomized, controlled design.  
13  
14  
15  
16

## 17 18 **METHODS**

### 19 **Search strategy and selection criteria**

20 A systematic literature search was performed to identify randomized, double-blind, placebo  
21 controlled trials in which any systemic corticosteroid (defined as oral, intravenous, or  
22 intramuscular) or a placebo had been administered to randomly selected groups of patients in  
23 the treatment of a medical disorder or to healthy subjects.  
24  
25  
26  
27

28 We searched the databases MEDLINE and EMBASE with no language restrictions between  
29 1983 (since the last search by Conn et al.)<sup>1</sup> and 30th June 2011 using the following text  
30 words: (betamethasone/ or dexamethasone/ or methylprednisolone/ or prednisolone/ or  
31 prednisone/ or triamcinolone/ or cortisone/ or hydrocortisone/) limited to randomized  
32 controlled trial, 1983 to 20110630, humans, double-blind.mp and placebo.mp. For full search  
33 strategy, see supplementary file 1. Cochrane Database of Systematic Reviews was searched  
34 for corticosteroids and the following text words: Traumatic injury, sepsis/septic shock,  
35 meningitis, bronchopulmonary dysplasia, liver diseases, lung diseases and rheumatoid  
36 arthritis. Only results fully reported in journal articles in English, German, or any  
37 Scandinavian language were considered for inclusion. Whenever a title or abstract suggested  
38 that a randomized, double-blind, placebo controlled trial comparing a corticosteroid to  
39 placebo was performed, the full text version was reviewed for documentation of  
40 gastrointestinal adverse events. Articles with documentation of gastrointestinal adverse  
41 effects or with assessment of adverse event monitoring described in the methods section were  
42 included. Titles, abstracts, and full-text articles were evaluated and reviewed for inclusion by  
43 at least two of the authors. Disagreements were resolved by consensus among the reviewers.  
44  
45  
46  
47  
48  
49  
50  
51  
52  
53  
54  
55

56 Methodological quality assessment of eligible trials was done by including only randomized,  
57 double-blind studies.<sup>21</sup> In most studies, there was no specific description of randomisation  
58  
59  
60

1  
2  
3 and allocation concealment, blinding methods, or handling of withdrawals. Authors'  
4 description of randomization and double-blinding was assumed to be valid. We used  
5 intention-to-treat data when available. All types of co-medications were allowed if  
6 administered systematically to both groups or as a part of standard care. No medical disorder  
7 or age groups were excluded. When medications known to induce gastrointestinal symptoms,  
8 such as non-steroidal anti-inflammatory drugs (NSAIDs) or acetylsalicylic acid (ASA) had  
9 been used, these medications were analysed as co-variables. We excluded trials with  
10 crossover design because of potential difficulties in assessment between the treatment groups.  
11 Trials in which the steroid was given as a single dose were also excluded due to generally  
12 short follow up.  
13  
14  
15  
16  
17  
18  
19  
20

### 21 **Data extraction and outcomes reporting**

22 For the diagnosis of complications of gastroduodenal ulcers, such as occult or visible blood in  
23 stool, gastrointestinal bleeding, haematemesis, melena, and gastrointestinal perforation, the  
24 investigators' diagnoses were accepted as valid without requiring specific criteria or methods.  
25 Outcomes like dyspepsia, gastritis, duodenitis, and epigastric pain were not included, nor  
26 were necrotizing enterocolitis. For assessment of gastrointestinal bleeding or perforation as  
27 an adverse effect, the number of events should be reported in the results section as text or in a  
28 table. Events reported as percentages only, were calculated to numbers by us. Trials where  
29 other adverse effects were reported in the results section but no gastrointestinal bleeding  
30 listed were included only if adverse event monitoring was described in the methods section  
31 and if it was judged reasonable to expect from the adverse event monitoring system that any  
32 gastrointestinal adverse effects would have been recorded.  
33  
34  
35  
36  
37  
38  
39  
40

41 We recorded information on study characteristics and demographics such as publication year,  
42 corticosteroid use, indication for treatment, use of concomitant medications, description of  
43 adverse effect, study size, duration of treatment and follow up. Severity of disease was  
44 assessed, by assuming that patients needing hospitalisation were sicker than patients in  
45 ambulatory care. Information regarding exclusion from study by ongoing, recent or a history  
46 of peptic ulcer disease were also recorded.  
47  
48  
49  
50  
51  
52

### 53 **Statistical analysis**

54 The relative frequencies of the adverse effects were compared in the placebo and the  
55 corticosteroid group(s) using conventional statistics and meta-analysis. Subgroup analyses  
56  
57  
58  
59  
60

were performed for different medical conditions, for concomitant NSAIDs use, and for disease severity.

All meta-analytic calculations were made with RevMan (version 5.2) using the Mantel-Haenszel method with random effects model. A limitation of the Mantel-Haenszel method for meta-analysis is that when zero events occur in both arms of a study, the log OR becomes undefined and these studies have to be excluded. To overcome this problem, a continuity correction of 1 in both arms was used.<sup>22 23</sup> For other statistics, SPSS (version 20) was used. For binary outcomes, we calculated odds ratios and 95 % confidence intervals. All analyses were two-tailed, with  $\alpha$  of 0.05.

## RESULTS

### Literature search and study selection

The search process identified 3483 records from database searches and fifteen studies were retrieved by hand searching. A total of 159 articles fitted our inclusion criteria and were included in the review. Further details regarding study inclusion and exclusion are shown in figure 1. We performed an updated search 22<sup>nd</sup> may 2013 and retrieved 3 additional studies reporting confirmed gastrointestinal bleeding events. The new studies did not change the results.

### Characteristics of included studies

In this systematic review 159 studies were included. The main medical conditions were severe infections, lung diseases, traumatic injuries, and prevention of bronchopulmonary dysplasia in (premature) infants. Further details regarding the disease groups are shown in table 1.

Table 1: Medical conditions in which corticosteroids were tested, with number of studies, number of participants, and number of adverse effects. Grouping by treatment level was based on statements in the reports and, if there was no indication of treatment level, on clinical judgement. Conditions like traumatic injury, meningitis, sepsis/septic shock, and bronchopulmonary dysplasia were defined as hospitalized.

|  | Hospitalized      |                        |                           | Ambulant          |                        |                           | Total |
|--|-------------------|------------------------|---------------------------|-------------------|------------------------|---------------------------|-------|
|  | Number of studies | Number of participants | Number of adverse effects | Number of studies | Number of participants | Number of adverse effects |       |
|  |                   |                        |                           |                   |                        |                           |       |

| Disease                                         | es  |          |         |          |         | es |          |         |          | Sum participants |         |
|-------------------------------------------------|-----|----------|---------|----------|---------|----|----------|---------|----------|------------------|---------|
|                                                 |     | Steroids | Placebo | Steroids | Placebo |    | Steroids | Placebo | Steroids |                  | Placebo |
| Traumatic injury (brain, spinal cord, multiple) | 9   | 5821     | 5790    | 95       | 75      | 0  | -        | -       | -        | -                | 11611   |
| Meningitis                                      | 18  | 1589     | 1549    | 110      | 91      | 0  | -        | -       | -        | -                | 3138    |
| Sepsis / septic shock                           | 7   | 482      | 449     | 32       | 28      | 0  | -        | -       | -        | -                | 931     |
| Bronchopulmonary dysplasia                      | 21  | 1508     | 1487    | 155      | 85      | 0  | -        | -       | -        | -                | 2995    |
| Liver diseases *                                | 4   | 150      | 114     | 26       | 15      | 3  | 705      | 709     | 5        | 1                | 1678    |
| Lung diseases %                                 | 20  | 1149     | 1105    | 8        | 3       | 7  | 537      | 544     | 0        | 0                | 3335    |
| Rheumatoid arthritis                            | 0   | -        | -       | -        | -       | 5  | 283      | 279     | 1        | 2                | 562     |
| Miscellaneous #                                 | 24  | 1743     | 1666    | 46       | 24      | 41 | 2806     | 2788    | 2        | 0                | 9003    |
| Sum                                             | 103 | 12442    | 12160   | 472      | 321     | 56 | 4331     | 4320    | 8        | 3                | 33253   |

Steroids = corticosteroids. \* Hepatitis, liver cirrhosis, acute hepatic failure. % Asthma, ARDS, bronchiolitis, chronic obstructive pulmonary disease, pneumonia, tuberculosis, ventilator weaning. # Miscellaneous diseases as stated in the original reports (number of studies in brackets): Acute otitis media, adhesive capsulitis, allergic rhinitis, Alzheimer's disease, Bechets syndrome, Bell's palsy (2), carpal tunnel syndrome, cerebral infarction, chronic fatigue syndrome, coronary artery bypass grafting (2), cysticercus granuloma with seizures, depression, Duchenne's muscular dystrophy, emesis (9), erysipelas, facial nerve paralysis (2), glaucoma, Grave's orbitopathy, Guillain-Barré syndrome (2), healthy postmenopausal women, Henoch Schonlein purpura (2), herpes zoster (3), IgA nephropathy, intracerebral hemorrhage (2), leprosy, lumbar disc surgery, migraine headaches, multiple sclerosis (3), myocardial infarction (2), post-infectious irritable bowel syndrome, preeclampsia, (pre)terminal cancer (2), aphthous stomatitis, sinonasal polyposis, sinusitis, Sjögren's syndrome, Sydenham's Chorea children, tetanus, tonsillectomy (2), tuberculous pericarditis in HIV, typhoid fever, urticaria, vestibular neuritis, withdrawal headache.

The corticosteroids used were dexamethasone (55), prednisolone (30), methylprednisolone (29), prednisone (22), hydrocortisone (16), and other steroids or combinations (7). The sample size ranged from 15 to 10 008 people, with a median sample size of 86. The median duration of treatment was 8.5 days (range 1 to 1095 days), and the median follow-up period was 56 days (range 1 to 1155 days). The adverse effects were described as any form of bleeding in 59 studies (upper /lower, minor, haematemesis, melena, visible/occult blood in stool), perforation in 7 studies (perforated gastric ulcer, ileum perforation), and both bleeding and perforation in 6 studies. Altogether, 72 (45.3%) studies reported gastrointestinal bleeding or perforation as an adverse effect (67 hospitalized, 5 ambulant). In 87 studies, adverse event monitoring was described in the methods section without reporting any gastrointestinal adverse effects. Use of concomitant medication was described in 135 studies (84.9%). In addition, use of concomitant medication was likely in many of the remaining 24 studies, as a consequence of diagnoses such as ARDS, bronchopulmonary dysplasia, and traumatic injury



to head or spine. Concomitant use of NSAIDs /ASA was described in 19 studies (bronchopulmonary dysplasia, rheumatoid arthritis, miscellaneous and sepsis in 9, 5, 4, and 1 study, respectively). Use of medication for any other illnesses was not described, except from gastric protection described in 13 studies (one ambulant, 12 hospitalized). Peptic ulcer; ongoing, recent or previous, was an exclusion criteria in 53 (33.3%) of the studies. In the majority of studies (85, 53.5%), the authors reported no effect of corticosteroids on the primary outcome. Study specific characteristics are shown in table 2.

Table 2: Study specific characteristics

|                                           | Studies total     | Studies with bleeding | Studies without bleeding |
|-------------------------------------------|-------------------|-----------------------|--------------------------|
| <b>Studies included (%)</b>               | 159               | 72 (45.3)             | 87 (54.7)                |
| <b>Year of publication, median</b>        |                   | 1998                  | 1999                     |
| <b>Description of adverse effect (%)</b>  |                   |                       |                          |
| Bleeding                                  |                   | 59 (81.9)             |                          |
| Perforation                               |                   | 7 (9.7)               |                          |
| Bleeding and perforation                  |                   | 6 (8.3)               |                          |
| Peptic ulcer only                         |                   |                       | 4                        |
| <b>Level of care (%)</b>                  |                   |                       |                          |
| Hospitalized                              | 103               | 67 (93.1)             | 36 (41.4)                |
| Ambulant                                  | 56                | 5 (6.9)               | 51 (58.6)                |
| <b>Use of concomitant medication (%)</b>  |                   |                       |                          |
| No concomitant medication described       | 24                | 11 (15.3)             | 13 (14.9)                |
| Concomitant medication described          | 135               | 61 (84.7)             | 74 (85.1)                |
| - NSAIDs / ASA                            | 19                | 11 (15.3)             | 8 (9.2)                  |
| - PPIs, H2 blockers, antacids             | 13                | 11 (15.3)             | 2 (2.3)                  |
| <b>Exclusion criteria (%)</b>             |                   |                       |                          |
| Recent / ongoing peptic ulcer             | 36                | 14 (19.4)             | 22 (25.3)                |
| Previous / history of peptic ulcer        | 17                | 6 (8.3)               | 11 (12.6)                |
| <b>Study size, number of participants</b> |                   |                       |                          |
| Median (range 15-10008) (IQR)             | 86 (49.0 - 181.0) | 100 (60.3 - 246.5)    | 70 (40.0 - 128.0)        |
| <b>Duration of treatment, days</b>        |                   |                       |                          |
| Median (range 1-1095) (IQR)               | 8.5 (3.3 - 28.0)  | 6.0 (3.0 - 12.0)      | 14 (4.0 - 45.0)          |
| <b>Duration of follow up, days</b>        |                   |                       |                          |
| Median (range 1-1155) (IQR)               | 56 (21.0 - 243.8) | 33 (21.0 - 180.0)     | 58 (19.5 - 286.5)        |

NSAIDs= nonsteroidal antiinflammatory drugs, ASA= acetyl salicylic acid, PPIs= proton pump inhibitors, IQR= interquartile range

### Risk of gastrointestinal bleeding or perforation

The analysis included 33 253 participants (16 773 received corticosteroids and 16 480 received placebo). Of those, 804 patients (480 receiving a corticosteroid and 324 receiving a placebo) were reported to have a gastrointestinal bleeding or perforation, which comprises

2.4 % of the study participants (2.9% and 2.0% for corticosteroids and placebo, respectively). Overall, meta-analysis of all the included studies showed a 30% increased odds ratio of experiencing gastrointestinal bleeding or perforation among corticosteroid users compared to placebo users (odds ratio 1.32, 95% confidence interval 1.15 to 1.51) (figure 2, and supplementary file 2). Subgroup analysis for each disease group showed a trend towards an increased risk of gastrointestinal bleeding or perforation in seven out of eight subgroups, but the result was statistically significant only for (premature) infants in prevention of bronchopulmonary dysplasia (1.77, 1.34 to 2.35).

### Sensitivity analyses

Data from sensitivity analyses are shown in table 3.

Table 3: Summary of subgroup analyses.

|                                                    | Number of studies | Number of patients | Odds ratio (95% confidence interval) |
|----------------------------------------------------|-------------------|--------------------|--------------------------------------|
| Hospitalized                                       | 103               | 24 602             | 1.37 (1.18 - 1.59)                   |
| Ambulant                                           | 56                | 8651               | 1.03 (0.70 - 1.50)                   |
| NSAID use not documented                           | 140               | 30874              | 1.31 (1.13 - 1.53)                   |
| NSAID use documented                               | 19                | 2379               | 1.34 (0.98 - 1.83)                   |
| Peptic ulcer as exclusion criterion not documented | 106               | 25 760             | 1.36 (1.17 - 1.59)                   |
| Peptic ulcer as exclusion criterion documented     | 53                | 7493               | 1.13 (0.81 - 1.57)                   |

Subgroup analysis of studies with hospitalized patients showed increased risk of developing gastrointestinal bleeding or perforation (odds ratio 1.37, 95% confidence interval 1.18 to 1.59). Odds ratio was not increased for patients in ambulatory care (1.03, 0.70 to 1.50). When the 140 studies without documentation of concomitant NSAID use were analysed separately, a significant difference between corticosteroid and placebo with respect to gastrointestinal bleeding or perforation was still present (1.31, 1.13 to 1.53). When all studies of (premature) infants in prevention of bronchopulmonary dysplasia were excluded from analyses (assuming NSAIDs were given in all studies), the results were still significant (data not shown).

Subgroup analysis of studies without peptic ulcer as exclusion criterion showed increased risk of gastrointestinal bleeding or perforation by corticosteroid use (1.36, 1.17 to 1.59). Odds ratio was not increased for studies describing peptic ulcer as exclusion criterion (1.13, 0.81 to 1.57).

1  
2  
3 The majority of the adverse effects occurred in hospitalized patients. Only 11 gastrointestinal  
4 bleedings or perforations occurred among 8 651 patients in ambulatory care (0.13%),  
5 compared to 793 gastrointestinal bleeds or perforations among 24 602 hospitalized patients  
6 (3.22%) ( $p < 0.001$ )(table 1).  
7  
8  
9

## 10 11 **DISCUSSION**

12 The overall findings of this systematic review show that use of corticosteroids may increase  
13 the odds ratio by 30% for gastrointestinal bleeding or perforation. The increased risk,  
14 however, was limited to hospitalized patients. In contrast, increased risk was not seen in  
15 ambulatory care, which showed very low absolute occurrence of gastrointestinal bleeding or  
16 perforation. The results persisted when high risk patients (concomitant NSAID use or  
17 previous peptic ulcer as exclusion criterion) were excluded, indicating the robustness of the  
18 results. Based on our results, prophylactic treatment with acid-suppressive therapy is not  
19 necessary for patients using corticosteroids in ambulatory care.  
20  
21  
22  
23  
24  
25  
26  
27

### 28 **Comparison with other studies**

29 Previously published meta-analyses addressing whether corticosteroid use predispose for  
30 gastrointestinal bleeding or perforation have shown conflicting results.<sup>1-3</sup> In two meta-  
31 analyses, Conn et al. concluded that there was no increased risk of peptic ulcer,  
32 gastrointestinal bleeding or perforation by corticosteroid use.<sup>1,2</sup> In contrast, Messer et al.  
33 found an increased incidence of both peptic ulcer and gastrointestinal bleeding.<sup>3</sup> In a  
34 subgroup analysis by Conn,<sup>2</sup> however, there was a significantly higher rate of gastrointestinal  
35 bleeding from an unknown site among corticosteroid users compared to controls. In his  
36 second paper, steroid users had more gastrointestinal adverse effects (ulcers, symptoms of  
37 ulcers, bleeding, erosions and perforation) than the controls, but because of division of the  
38 material into several subgroups and no pooling of results, no differences emerged as  
39 statistically significant.<sup>1</sup> These meta-analyses of randomized controlled trials, which included  
40 published literature up to 1983, show how different inclusion criteria, selection criteria, data  
41 handling and interpretation of results may give totally different results and conclusions.  
42 Newer Cochrane meta-analyses have addressed the question in selective patient populations  
43 (meningitis, traumatic brain injury, and preterm infants). These analyses show a trend<sup>24-26</sup> or a  
44 statistically significant increase<sup>27</sup> in risk ratio of experiencing gastrointestinal bleeding, with  
45 the included studies and results similar to the subgroups in our study.  
46  
47  
48  
49  
50  
51  
52  
53  
54  
55  
56  
57  
58  
59  
60

1  
2  
3 In our study we included the literature published from 1983 up to date. With 33 253  
4 participants from double-blind, randomized, controlled trials, this is the largest meta-analysis  
5 analysing whether corticosteroids cause increased risk of gastrointestinal bleeding. Due to the  
6 large size of our study, findings that were seen as trends in other reviews or went unnoticed  
7 because of many subgroup analyses have emerged as a significant increase in risk, despite  
8 non-significant occurrence in all subgroups except prevention of bronchopulmonary  
9 dysplasia in (premature) infants. Surprisingly, peptic ulcers were hardly listed as an adverse  
10 effect in the included studies, in contrast to the studies in the previous reviews by Conn and  
11 Messer. One explanation may be the differences in disease panorama and the discovery and  
12 treatment of *Helicobacter Pylori*. The true occurrence of peptic ulcer may also have been  
13 underestimated in the studies because of heavy medication and intensive care treatment.  
14  
15  
16  
17  
18  
19  
20  
21

### 22 **Strengths and limitations of this review**

23  
24 In many reviews, only studies with relevant events have been included in the meta-analyses  
25 due to statistical difficulties when calculating risks for zero events. In our analysis, we have  
26 included all studies and addressed the problem of zero event analysis by adding a correction  
27 factor of 1 to both groups. This enabled us to include results from 56 studies from ambulatory  
28 care instead of only five. Exclusion of studies where no problems occurred would have led to  
29 an overestimation of the risk of bleeding and an underestimation of the existing patient data.  
30 Overall, inclusion of all studies with relevant design, including those with concomitant  
31 medications, may reflect more realistic treatment conditions and may contribute to the  
32 validity of our results. Due to the large size of our review we were able to do predefined  
33 subgroup analyses according to severity of disease (ie recorded as hospitalized or as ambulant  
34 treatment). To our knowledge, this is the first study to indicate that disease severity might  
35 influence the risk of gastrointestinal bleeding or perforation by corticosteroid use.  
36  
37  
38  
39  
40  
41  
42  
43  
44

45  
46 The main limitations of this review are the possible loss of relevant studies due to the selected  
47 search strategy, and the quality of the primary research studies. We believe the results to be  
48 robust, despite this, due to the large number of included studies and participants. Randomized  
49 controlled trials are designed to show effect of treatment, not to detect adverse effects, which  
50 in many studies were sparsely reported or not reported at all. However, since we included  
51 only double-blind studies with placebo control, we suspect similar under-reporting in both  
52 study groups. We aimed to include all disease groups, but still some groups may be under-  
53 represented (i.e rheumatoid arthritis, organ transplanted patients) since corticosteroid use is  
54  
55  
56  
57  
58  
59  
60

1  
2  
3 standard treatment and no longer compared to placebo in randomized controlled trials.  
4 Patients included in randomized controlled trials may differ from patients excluded from trial  
5 participation, and may be healthier (no previous peptic ulcer). This may underestimate the  
6 true effect of corticosteroids on gastrointestinal bleeding and perforation in the population. In  
7 the majority of the included studies, use of concomitant medications was allowed and  
8 described. Concomitant medication was related to the study indication (disease group), in  
9 contrast to medications for concomitant diseases, which were hardly mentioned. It is  
10 therefore impossible to assess whether the corticosteroid, other medications, undisclosed  
11 medications, the combination, the disease or other treatment caused gastrointestinal bleeding  
12 or perforation in these cases.  
13  
14  
15  
16  
17  
18  
19  
20

### 21 **Clinical implications of this review**

22 Our analysis showed that the increased risk of gastrointestinal bleeding or perforation applied  
23 to hospitalized patients only, indicating that additional factors to corticosteroid therapy, such  
24 as disease severity or advanced medical treatment may make some patients more vulnerable  
25 to corticosteroid use. One explanation is that the bleedings and perforations seen among  
26 hospitalized patients may be complications to the stress ulcers seen in critically ill patients.  
27 To scrutinize this further we aimed to do separate analyses of critically ill patients or  
28 treatment in intensive care units, but lack of descriptions of critical illness or treatment in  
29 intensive care units in the included studies made us use hospitalization and ambulant  
30 treatment as surrogate markers for disease severity.  
31  
32  
33  
34  
35  
36  
37

38 Stress ulcers occur in response to severe physiologic stress in critically ill patients. Although  
39 the mechanism is not completely understood, it involves decreased mucosal blood flow and  
40 subsequent tissue ischemia, resulting in breakdown of mucosal defences, allowing  
41 physiological factors to produce injury and ulceration.<sup>28</sup> Many risk factors for stress ulcer  
42 bleeding have been proposed,<sup>28 29</sup> but only mechanical ventilation and coagulopathy have  
43 been documented as independent risk factors. Despite this evidence, several studies have  
44 shown that acid-suppressive therapy is used as stress ulcer prophylaxis in both hospital wards  
45 and outpatient settings.<sup>15-17</sup> An explanation to the inappropriate use of acid-suppressive  
46 therapy may be the description of peptic ulcer disease and gastrointestinal bleeding as  
47 possible adverse effects to corticosteroids in product monographs.<sup>11 12</sup> Despite databases and  
48 clinical recommendations which describe an association between corticosteroid use and  
49 peptic ulcer as unlikely or doubt the value of anti-ulcer prophylaxis due to a low bleeding  
50 risk, this information does not seem to reach the prescribers.<sup>8 13</sup> Another possibility is that the  
51  
52  
53  
54  
55  
56  
57  
58  
59  
60

1  
2  
3 prescribers are convinced their patients are sicker or more fragile than the average patient and  
4 use acid-suppressive therapy just in case. According to our results, this acid-suppressive  
5 therapy is not necessary for patients in ambulatory care. In ambulatory care, the total  
6 occurrence of gastrointestinal bleedings and perforations was very low (0.13%) and there was  
7 no statistically significant difference between corticosteroid and placebo groups.  
8  
9  
10

11  
12  
13  
14 Contributors: SN, TW and MK conceived the study, performed the systematic review, data extraction,  
15 analysed the data, and drafted the manuscript. All authors had full access to the data and take  
16 responsibility for the integrity of the data and accuracy of the analysis. SN is guarantor.  
17  
18

19 Funding: None.

20 Competing interests: All authors have completed the ICMJE uniform disclosure form at  
21 [www.icmje.org/coi\\_disclosure.pdf](http://www.icmje.org/coi_disclosure.pdf) and declare: no support from any organisation for the submitted  
22 work; no financial relationships with any organisations that might have an interest in the submitted  
23 work in the previous three years; no other relationships or activities that could appear to have  
24 influenced the submitted work.  
25  
26

27 Ethical approval: Not required.

28 Data sharing: Dataset available from the corresponding author.  
29  
30  
31  
32  
33  
34  
35

## 36 REFERENCES

- 37 1. Conn HO, Poynard T. Corticosteroids and peptic ulcer: meta-analysis of adverse events during steroid  
38 therapy. *J Intern Med* 1994;236: 619-32.
- 39 2. Conn HO, Blitzer BL. Nonassociation of adrenocorticosteroid therapy and peptic ulcer. *N Engl J Med*  
40 1976;294: 473-9.
- 41 3. Messer J, Reitman D, Sacks HS, Smith H, Jr., Chalmers TC. Association of adrenocorticosteroid  
42 therapy and peptic-ulcer disease. *N Engl J Med* 1983;309: 21-4.
- 43 4. Nielsen GL, Sorensen HT, Mellemkjoer L, Blot WJ, McLaughlin JK, Tage-Jensen U, et al. Risk of  
44 hospitalization resulting from upper gastrointestinal bleeding among patients taking corticosteroids: a  
45 register-based cohort study. *Am J Med* 2001;111: 541-5.
- 46 5. Hernandez-Diaz S, Rodriguez LA. Steroids and risk of upper gastrointestinal complications. *Am J*  
47 *Epidemiol* 2001;153: 1089-93.
- 48 6. Piper JM, Ray WA, Daugherty JR, Griffin MR. Corticosteroid use and peptic ulcer disease: role of  
49 nonsteroidal anti-inflammatory drugs. *Ann Intern Med* 1991;114: 735-40.  
50  
51  
52  
53  
54  
55  
56  
57  
58  
59  
60



- 1
- 2
- 3 7. de Abajo FJ, Gil MJ, Bryant V, Timoner J, Oliva B, Garcia-Rodriguez LA. Upper gastrointestinal
- 4 bleeding associated with NSAIDs, other drugs and interactions: a nested case-control study in a new
- 5 general practice database. *Eur J Clin Pharmacol* 2013;69: 691-701.
- 6
- 7 8. Corticosteroids: Introduction (Martindale: The Complete Drug Reference). [http://online.lexi](http://online.lexi.com/lco/action/doc/retrieve/docid/martindale_f/1353587)
- 8 [com/lco/action/doc/retrieve/docid/martindale\\_f/1353587](http://online.lexi.com/lco/action/doc/retrieve/docid/martindale_f/1353587) 2010 [cited 2013 Feb 18]; Available from:
- 9 URL: [http://online.lexi.com/lco/action/doc/retrieve/docid/martindale\\_f/1353587](http://online.lexi.com/lco/action/doc/retrieve/docid/martindale_f/1353587)
- 10
- 11 9. Saag KG, Furst DE. Major side effects of systemic glucocorticoids. *www UpToDate com* 2012 October
- 12 11 [cited 2013 Mar 5]; Available from: URL: [www.uptodate.com](http://www.uptodate.com)
- 13
- 14 10. Joint Formulary Committee. British National Formulary. Side-effects of corticosteroids. *www*
- 15 [medicinescomplete com](http://www.medicinescomplete.com) 2013 [cited 2013 Aug 14]; Available from: URL:
- 16 [www.medicinescomplete.com](http://www.medicinescomplete.com)
- 17
- 18 11. Summary of product characteristics; Dexamethasone Tablets BP 2.0mg. *www mhra gov uk* 2012
- 19 November 13 [cited 2013 Aug 14]; Available from: URL:
- 20 <http://www.mhra.gov.uk/home/groups/spcpil/documents/spcpil/con1369200053458.pdf>
- 21
- 22 12. Summary of product characteristics; Prednisolone 5mg Tablets. *www mhra gov uk* 2011 July 5 [cited
- 23 2013 Aug 14]; Available from: URL:
- 24 <http://www.mhra.gov.uk/home/groups/spcpil/documents/spcpil/con1364186684018.pdf>
- 25
- 26 13. Gold Standard, Inc. Prednisone. *Clinical Pharmacology* 2012 September 8 [cited 2013 Oct
- 27 11]; Available from: URL: <http://www.clinicalpharmacology.com>
- 28
- 29 14. Martinek J, Hlavova K, Zavada F, Seifert B, Rejchrt S, Urban O, et al. "A surviving myth"--
- 30 corticosteroids are still considered ulcerogenic by a majority of physicians. *Scand J Gastroenterol*
- 31 2010;45: 1156-61.
- 32
- 33 15. Heidelbaugh JJ, Inadomi JM. Magnitude and economic impact of inappropriate use of stress ulcer
- 34 prophylaxis in non-ICU hospitalized patients. *Am J Gastroenterol* 2006;101: 2200-5.
- 35
- 36 16. Zink DA, Pohlman M, Barnes M, Cannon ME. Long-term use of acid suppression started
- 37 inappropriately during hospitalization. *Aliment Pharmacol Ther* 2005;21: 1203-9.
- 38
- 39 17. Munson JC, Wahl PM, Daniel G, Kimmel SE, Hennessy S. Factors associated with the initiation of
- 40 proton pump inhibitors in corticosteroid users. *Pharmacoepidemiol Drug Saf* 2012;21: 366-74.
- 41
- 42 18. van der Goes MC, Jacobs JW, Boers M, Andrews T, Blom-Bakkers MA, Buttgerit F, et al. Monitoring
- 43 adverse events of low-dose glucocorticoid therapy: EULAR recommendations for clinical trials and
- 44 daily practice. *Ann Rheum Dis* 2010;69: 1913-9.
- 45
- 46 19. Ahsberg K, Ye W, Lu Y, Zheng Z, Stael von HC. Hospitalisation of and mortality from bleeding peptic
- 47 ulcer in Sweden: a nationwide time-trend analysis. *Aliment Pharmacol Ther* 2011;33: 578-84.
- 48
- 49 20. Lanas A, Garcia-Rodriguez LA, Polo-Tomas M, Ponce M, Quintero E, Perez-Aisa MA, et al. The
- 50 changing face of hospitalisation due to gastrointestinal bleeding and perforation. *Aliment Pharmacol*
- 51 *Ther* 2011;33: 585-91.
- 52
- 53 21. Juni P, Witschi A, Bloch R, Egger M. The hazards of scoring the quality of clinical trials for meta-
- 54 analysis. *JAMA* 1999;282: 1054-60.
- 55
- 56 22. Friedrich JO, Adhikari NK, Beyene J. Inclusion of zero total event trials in meta-analyses maintains
- 57 analytic consistency and incorporates all available data. *BMC Med Res Methodol* 2007;7: 5.
- 58
- 59 23. Cochrane Handbook for Systematic Reviews of Interventions: 16.9 Rare events (including zero
- 60 frequencies). <http://handbook.cochrane.org/> 2011 March [cited 2013 Aug 14]; (Version 5.1.0) Available
- from: URL: <http://handbook.cochrane.org/>

- 1
- 2
- 3 24. Alderson P, Roberts I. Corticosteroids for acute traumatic brain injury. *Cochrane Database Syst Rev* 2005; CD000196.
- 4
- 5
- 6 25. Brouwer MC, McIntyre P, de GJ, Prasad K, van de Beek D. Corticosteroids for acute bacterial meningitis. *Cochrane Database Syst Rev* 2010; CD004405.
- 7
- 8
- 9 26. Halliday HL, Ehrenkranz RA, Doyle LW. Late (>7 days) postnatal corticosteroids for chronic lung disease in preterm infants. *Cochrane Database Syst Rev* 2009; CD001145.
- 10
- 11 27. Halliday HL, Ehrenkranz RA, Doyle LW. Early (< 8 days) postnatal corticosteroids for preventing chronic lung disease in preterm infants. *Cochrane Database Syst Rev* 2010; CD001146.
- 12
- 13
- 14 28. Stollman N, Metz DC. Pathophysiology and prophylaxis of stress ulcer in intensive care unit patients. *J Crit Care* 2005;20: 35-45.
- 15
- 16
- 17 29. Cook DJ, Fuller HD, Guyatt GH, Marshall JC, Leasa D, Hall R, et al. Risk factors for gastrointestinal bleeding in critically ill patients. Canadian Critical Care Trials Group. *N Engl J Med* 1994;330: 377-81.
- 18
- 19
- 20
- 21
- 22

23 Figure texts and titles

24  
25 Supplementary file 2: Forest plot. Gastrointestinal bleeding in corticosteroid users versus placebo  
26 users.

27  
28 The Mantel-Haenszel (M-H) method with random effects model was used. When zero events occurred in both  
29 arms of a study, a continuity correction of 1 was used in both arms.



1  
2  
3  
4  
5  
6  
7  
8  
9  
10  
11  
12  
13  
14  
15  
16  
17  
18  
19  
20  
21  
22  
23  
24  
25  
26  
27  
28  
29  
30  
31  
32  
33  
34  
35  
36  
37  
38  
39  
40  
41  
42  
43  
44  
45  
46  
47  
48  
49  
50  
51  
52  
53  
54  
55  
56  
57  
58  
59  
60

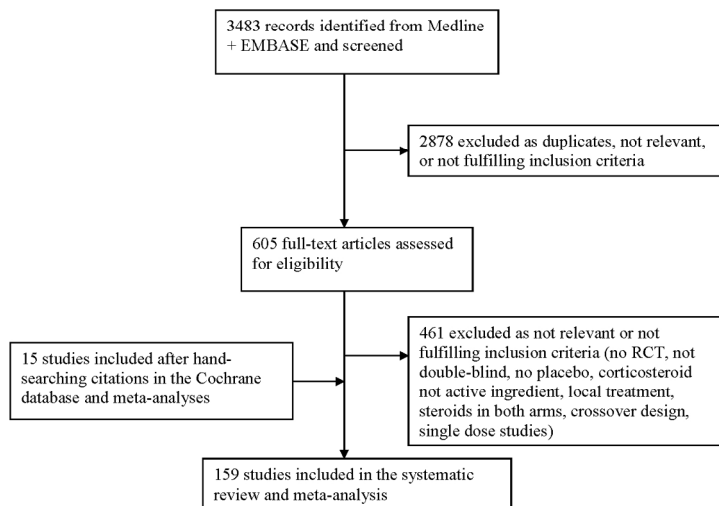

Figure 1: Flowchart for the selection of eligible studies

Flowchart  
210x297mm (200 x 200 DPI)

1  
2  
3  
4  
5  
6  
7  
8  
9  
10  
11  
12  
13  
14  
15  
16  
17  
18  
19  
20  
21  
22  
23  
24  
25  
26  
27  
28  
29  
30  
31  
32  
33  
34  
35  
36  
37  
38  
39  
40  
41  
42  
43  
44  
45  
46  
47  
48  
49  
50  
51  
52  
53  
54  
55  
56  
57  
58  
59  
60

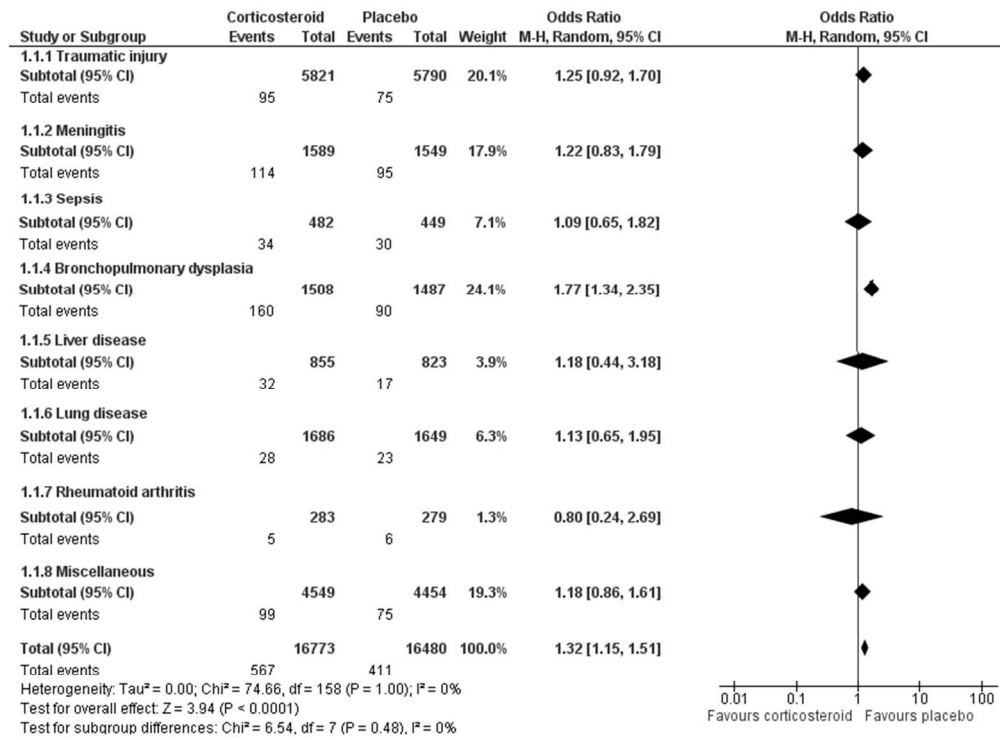

Summary of pooled results for all disease groups  
 The Mantel-Haenszel (M-H) method with random effects model was used. When zero events occurred in both arms of a study, a continuity correction of 1 was used in both arms. For Forest plot with all included studies, see Supplementary file 1.

## Supplementary file 1: Search strategy

Database: Ovid MEDLINE(R) &lt;1948 to June Week 4 2011&gt;

Search Strategy:

```
-----  
1  exp Glucocorticoids/ (146604)  
2  exp Betamethasone/ (5732)  
3  exp Dexamethasone/ (40372)  
4  exp Methylprednisolone/ (14855)  
5  exp Prednisolone/ (40385)  
6  exp Prednisone/ (31682)  
7  exp Triamcinolone/ (7212)  
8  exp Cortisone/ (14257)  
9  exp Hydrocortisone/ (58105)  
10 2 or 3 or 4 or 5 or 6 or 7 or 8 or 9 (179048)  
11 limit 10 to randomized controlled trial (9881)  
12 limit 11 to yr="1983 -Current" (9010)  
13 limit 12 to humans (8801)  
14 double-blind.mp. (131585)  
15 double blind.mp. (131585)  
16 14 or 15 (131585)  
17 13 and 16 (3380)  
18 placebo.mp. (129874)  
19 17 and 18 (2158)
```

\*\*\*\*\*

Search strategy  
215x279mm (200 x 200 DPI)

1  
2  
3  
4  
5  
6  
7  
8  
9  
10  
11  
12  
13  
14  
15  
16  
17  
18  
19  
20  
21  
22  
23  
24  
25  
26  
27  
28  
29  
30  
31  
32  
33  
34  
35  
36  
37  
38  
39  
40  
41  
42  
43  
44  
45  
46  
47  
48  
49  
50  
51  
52  
53  
54  
55  
56  
57  
58  
59  
60

| Study or Subgroup                                                                                          | Corticosteroid |       | Placebo |       | Weight             | M-H, Random, 95% CI  | Year | Odds Ratio | M-H, Random, 95% CI |
|------------------------------------------------------------------------------------------------------------|----------------|-------|---------|-------|--------------------|----------------------|------|------------|---------------------|
|                                                                                                            | Events         | Total | Events  | Total |                    |                      |      |            |                     |
| <b>1.1.1 Traumatic injury</b>                                                                              |                |       |         |       |                    |                      |      |            |                     |
| Braikman 1983                                                                                              | 1              | 81    | 1       | 80    | 0.2%               | 0.99 [0.06, 16.06]   | 1983 |            |                     |
| Diannella 1984                                                                                             | 1              | 72    | 0       | 16    | 0.2%               | 0.69 [0.03, 17.77]   | 1984 |            |                     |
| Davies 1986                                                                                                | 1              | 49    | 3       | 62    | 0.4%               | 1.26 [0.03, 5.96]    | 1986 |            |                     |
| Bracken 1990                                                                                               | 7              | 162   | 5       | 171   | 1.4%               | 1.50 [0.47, 4.82]    | 1990 |            |                     |
| Coak 1994                                                                                                  | 3              | 147   | 2       | 152   | 0.6%               | 1.56 [0.26, 9.49]    | 1994 |            |                     |
| Gumme 1985                                                                                                 | 1              | 187   | 3       | 209   | 0.4%               | 0.37 [0.04, 3.58]    | 1985 |            |                     |
| Matsuura 2001                                                                                              | 3              | 23    | 0       | 23    | 0.2%               | 8.02 [0.36, 184.79]  | 2001 |            |                     |
| Roberts 2004                                                                                               | 77             | 5007  | 61      | 5001  | 16.6%              | 1.26 [0.96, 1.77]    | 2004 |            |                     |
| Rozilly 2011                                                                                               | 1              | 74    | 0       | 76    | 0.2%               | 3.12 [0.13, 77.98]   | 2011 |            |                     |
| Subtotal (95% CI)                                                                                          | 1              | 6241  | 5700    | 26.1% |                    | 1.25 [0.82, 1.93]    |      |            |                     |
| Total events                                                                                               | 95             |       | 75      |       |                    |                      |      |            |                     |
| Heterogeneity: Tau <sup>2</sup> = 0.00, Chi <sup>2</sup> = 4.42, df = 8 (P = 0.79); I <sup>2</sup> = 0%    |                |       |         |       |                    |                      |      |            |                     |
| Test for overall effect: Z = 1.42 (P = 0.15)                                                               |                |       |         |       |                    |                      |      |            |                     |
| <b>1.1.2 Meningitis</b>                                                                                    |                |       |         |       |                    |                      |      |            |                     |
| Label 1988                                                                                                 | 4              | 53    | 0       | 49    | 0.2%               | 6.00 [0.47, 171.84]  | 1988 |            |                     |
| Label 1989                                                                                                 | 1              | 31    | 1       | 29    | 0.2%               | 0.93 [0.06, 16.05]   | 1989 |            |                     |
| Oski 1991                                                                                                  | 12             | 52    | 21      | 49    | 2.6%               | 0.40 [0.17, 0.94]    | 1991 |            |                     |
| Schaff 1993                                                                                                | 10             | 60    | 5       | 55    | 1.5%               | 2.00 [0.64, 6.27]    | 1993 |            |                     |
| King 1984                                                                                                  | 16             | 50    | 13      | 23    | 2.5%               | 1.30 [0.56, 3.27]    | 1984 |            |                     |
| Wald 1995                                                                                                  | 38             | 69    | 26      | 74    | 4.2%               | 2.26 [1.19, 4.44]    | 1995 |            |                     |
| Klug 1995                                                                                                  | 1              | 32    | 1       | 26    | 0.2%               | 0.91 [0.05, 13.05]   | 1995 |            |                     |
| Ozci 1996                                                                                                  | 3              | 48    | 2       | 41    | 0.6%               | 1.30 [0.21, 8.18]    | 1996 |            |                     |
| Chomungul 1996                                                                                             | 1              | 29    | 1       | 29    | 0.2%               | 1.04 [0.06, 17.38]   | 1996 |            |                     |
| Thomas 1999                                                                                                | 0              | 31    | 29      | 29    | 0.2%               | 5.17 [0.61, 3.86]    | 1999 |            |                     |
| Chomungul 2000                                                                                             | 1              | 55    | 1       | 55    | 0.2%               | 1.00 [0.06, 16.40]   | 2000 |            |                     |
| delaney 2002                                                                                               | 2              | 157   | 5       | 144   | 0.7%               | 1.36 [0.71, 1.88]    | 2002 |            |                     |
| Givner 2002                                                                                                | 3              | 29    | 1       | 20    | 0.3%               | 3.83 [0.32, 58.38]   | 2002 |            |                     |
| Thwaites 2004                                                                                              | 4              | 274   | 6       | 271   | 1.2%               | 1.65 [0.86, 2.92]    | 2004 |            |                     |
| Nguyen 2007                                                                                                | 11             | 217   | 6       | 218   | 1.9%               | 1.89 [0.69, 5.20]    | 2007 |            |                     |
| Senkar 2007                                                                                                | 1              | 12    | 1       | 13    | 0.2%               | 1.09 [0.06, 19.03]   | 2007 |            |                     |
| Peliss 2007                                                                                                | 6              | 166   | 2       | 163   | 0.7%               | 1.02 [0.65, 1.61]    | 2007 |            |                     |
| Scottrough 2007                                                                                            | 0              | 233   | 1       | 232   | 0.2%               | 0.33 [0.01, 8.15]    | 2007 |            |                     |
| Subtotal (95% CI)                                                                                          | 6              | 1589  | 1549    | 17.4% |                    | 1.22 [0.83, 1.78]    |      |            |                     |
| Total events                                                                                               | 114            |       | 95      |       |                    |                      |      |            |                     |
| Heterogeneity: Tau <sup>2</sup> = 0.10, Chi <sup>2</sup> = 20.22, df = 17 (P = 0.26); I <sup>2</sup> = 16% |                |       |         |       |                    |                      |      |            |                     |
| Test for overall effect: Z = 1.01 (P = 0.31)                                                               |                |       |         |       |                    |                      |      |            |                     |
| <b>1.1.3 Sepsis</b>                                                                                        |                |       |         |       |                    |                      |      |            |                     |
| Spring 1984                                                                                                | 1              | 43    | 2       | 16    | 0.3%               | 0.17 [0.01, 1.98]    | 1984 |            |                     |
| Victoria Akin 1987                                                                                         | 14             | 112   | 10      | 111   | 2.6%               | 1.44 [0.61, 3.40]    | 1987 |            |                     |
| Bolbert 1988                                                                                               | 1              | 22    | 3       | 19    | 0.3%               | 0.25 [0.02, 2.66]    | 1988 |            |                     |
| Briggs 1989                                                                                                | 1              | 20    | 0       | 20    | 0.2%               | 3.15 [0.12, 82.16]   | 1989 |            |                     |
| Yalcin 2002                                                                                                | 0              | 20    | 0       | 20    | 0.2%               | 1.00 [0.06, 17.10]   | 2002 |            |                     |
| Carroll 2007                                                                                               | 1              | 14    | 1       | 15    | 0.2%               | 1.08 [0.06, 19.05]   | 2007 |            |                     |
| Spring 2008                                                                                                | 15             | 251   | 13      | 248   | 2.3%               | 1.16 [0.56, 2.47]    | 2008 |            |                     |
| Subtotal (95% CI)                                                                                          | 1              | 482   | 449     | 7.1%  |                    | 1.09 [0.65, 1.82]    |      |            |                     |
| Total events                                                                                               | 34             |       | 30      |       |                    |                      |      |            |                     |
| Heterogeneity: Tau <sup>2</sup> = 0.00, Chi <sup>2</sup> = 4.52, df = 6 (P = 0.81); I <sup>2</sup> = 0%    |                |       |         |       |                    |                      |      |            |                     |
| Test for overall effect: Z = 0.32 (P = 0.75)                                                               |                |       |         |       |                    |                      |      |            |                     |
| <b>1.1.4 Bronchopulmonary dysplasia</b>                                                                    |                |       |         |       |                    |                      |      |            |                     |
| Cummings 1989                                                                                              | 8              | 25    | 8       | 11    | 0.6%               | 0.18 [0.04, 0.83]    | 1989 |            |                     |
| Kazzi 1990                                                                                                 | 1              | 12    | 1       | 11    | 0.2%               | 0.91 [0.05, 16.54]   | 1990 |            |                     |
| Collaborative Acetaminophen                                                                                | 6              | 143   | 3       | 142   | 1.0%               | 2.03 [0.56, 8.26]    | 1991 |            |                     |
| Sanders 1984                                                                                               | 1              | 19    | 21      | 0.2%  | 1.11 [0.06, 19.08] | 1984                 |      |            |                     |
| Binazzi 1995                                                                                               | 5              | 39    | 2       | 39    | 0.7%               | 2.72 [0.49, 14.86]   | 1995 |            |                     |
| Shirwad 1986                                                                                               | 28             | 132   | 12      | 116   | 3.6%               | 2.23 [1.13, 4.46]    | 1986 |            |                     |
| Rastogi 1996                                                                                               | 1              | 36    | 1       | 34    | 0.2%               | 0.94 [0.06, 15.70]   | 1996 |            |                     |
| Yan 1997                                                                                                   | 21             | 132   | 10      | 130   | 0.3%               | 2.27 [1.02, 5.03]    | 1997 |            |                     |
| Trapp 1998                                                                                                 | 1              | 53    | 1       | 54    | 0.2%               | 0.98 [0.06, 16.10]   | 1998 |            |                     |
| Gardner 1999                                                                                               | 12             | 118   | 7       | 123   | 2.0%               | 1.89 [0.71, 4.94]    | 1999 |            |                     |
| Walshony 1999                                                                                              | 1              | 20    | 0       | 20    | 0.2%               | 1.00 [0.06, 17.10]   | 1999 |            |                     |
| Lin 1999                                                                                                   | 1              | 29    | 1       | 20    | 0.2%               | 1.00 [0.06, 17.18]   | 1999 |            |                     |
| Sato 2001                                                                                                  | 3              | 188   | 2       | 185   | 0.6%               | 1.06 [0.26, 5.42]    | 2001 |            |                     |
| Vimont 2001                                                                                                | 33             | 273   | 21      | 269   | 5.7%               | 1.62 [0.91, 2.89]    | 2001 |            |                     |
| Stark 2001                                                                                                 | 21             | 111   | 10      | 109   | 2.9%               | 2.31 [1.03, 5.17]    | 2001 |            |                     |
| Walzberg 2004                                                                                              | 1              | 41    | 2       | 44    | 0.2%               | 0.53 [0.06, 6.02]    | 2004 |            |                     |
| Eliot 2005                                                                                                 | 1              | 16    | 0       | 16    | 0.2%               | 3.89 [0.14, 94.30]   | 2005 |            |                     |
| Amato 2005                                                                                                 | 6              | 53    | 2       | 56    | 0.7%               | 2.91 [0.52, 15.71]   | 2005 |            |                     |
| Peltonen 2005                                                                                              | 6              | 25    | 1       | 26    | 0.4%               | 7.89 [0.88, 71.21]   | 2005 |            |                     |
| Nu 2006                                                                                                    | 2              | 24    | 3       | 24    | 0.5%               | 0.84 [0.10, 4.20]    | 2006 |            |                     |
| Bonczak 2007                                                                                               | 2              | 29    | 1       | 29    | 0.2%               | 2.09 [0.16, 24.81]   | 2007 |            |                     |
| Subtotal (95% CI)                                                                                          | 1              | 1508  | 1487    | 24.1% |                    | 1.77 [1.34, 2.35]    |      |            |                     |
| Total events                                                                                               | 160            |       | 90      |       |                    |                      |      |            |                     |
| Heterogeneity: Tau <sup>2</sup> = 0.00, Chi <sup>2</sup> = 15.35, df = 20 (P = 0.76); I <sup>2</sup> = 0%  |                |       |         |       |                    |                      |      |            |                     |
| Test for overall effect: Z = 3.99 (P < 0.0001)                                                             |                |       |         |       |                    |                      |      |            |                     |
| <b>1.1.5 Liver disease</b>                                                                                 |                |       |         |       |                    |                      |      |            |                     |
| European Association 1988                                                                                  | 5              | 49    | 0       | 50    | 0.2%               | 12.48 [0.67, 232.14] | 1988 |            |                     |
| Carlines 1988                                                                                              | 2              | 35    | 3       | 31    | 0.5%               | 0.57 [0.06, 3.63]    | 1988 |            |                     |
| Rakita 1991                                                                                                | 11             | 44    | 5       | 12    | 1.2%               | 0.87 [0.25, 2.98]    | 1991 |            |                     |
| Ramoni 1992                                                                                                | 0              | 32    | 3       | 29    | 0.2%               | 1.02 [0.01, 2.38]    | 1992 |            |                     |
| Kingsgaard 1996                                                                                            | 0              | 101   | 1       | 99    | 0.2%               | 0.32 [0.01, 8.04]    | 1996 |            |                     |
| Sharma 2003                                                                                                | 1              | 525   | 1       | 562   | 0.2%               | 1.81 [0.06, 51.71]   | 2003 |            |                     |
| Arabi 2010                                                                                                 | 13             | 39    | 4       | 38    | 1.2%               | 4.00 [1.16, 13.74]   | 2010 |            |                     |
| Subtotal (95% CI)                                                                                          | 1              | 845   | 823     | 3.9%  |                    | 1.18 [0.84, 1.68]    |      |            |                     |
| Total events                                                                                               | 32             |       | 17      |       |                    |                      |      |            |                     |
| Heterogeneity: Tau <sup>2</sup> = 0.65, Chi <sup>2</sup> = 9.60, df = 6 (P = 0.13); I <sup>2</sup> = 39%   |                |       |         |       |                    |                      |      |            |                     |
| Test for overall effect: Z = 1.33 (P = 0.18)                                                               |                |       |         |       |                    |                      |      |            |                     |
| <b>1.1.6 Lung disease</b>                                                                                  |                |       |         |       |                    |                      |      |            |                     |
| Fiel 1983                                                                                                  | 1              | 49    | 1       | 53    | 0.2%               | 1.08 [0.07, 17.80]   | 1983 |            |                     |
| Faria 1983                                                                                                 | 1              | 11    | 9       | 2%    | 0.80 [0.04, 14.88] | 1983                 |      |            |                     |
| Weges 1985                                                                                                 | 1              | 39    | 1       | 42    | 0.2%               | 1.08 [0.07, 17.86]   | 1985 |            |                     |
| Barnes 1987                                                                                                | 1              | 50    | 1       | 49    | 0.2%               | 0.89 [0.06, 16.11]   | 1987 |            |                     |
| Luar 1988                                                                                                  | 21             | 19    | 19      | 0.2%  | 0.80 [0.05, 15.47] | 1988                 |      |            |                     |
| Gagnon 1990                                                                                                | 1              | 12    | 1       | 11    | 0.2%               | 0.91 [0.05, 15.84]   | 1990 |            |                     |
| Clauser 1992                                                                                               | 1              | 27    | 2       | 23    | 0.2%               | 0.85 [0.05, 14.32]   | 1992 |            |                     |
| Wimsley 1995                                                                                               | 1              | 40    | 0       | 38    | 0.2%               | 2.82 [0.12, 74.01]   | 1995 |            |                     |
| Galara 1995                                                                                                | 1              | 51    | 0       | 60    | 0.2%               | 1.05 [0.06, 17.25]   | 1995 |            |                     |
| Weyer 1995                                                                                                 | 1              | 34    | 3       | 34    | 0.2%               | 0.80 [0.05, 17.68]   | 1995 |            |                     |
| Arens 1996                                                                                                 | 1              | 33    | 0       | 33    | 0.2%               | 3.09 [0.12, 78.70]   | 1996 |            |                     |
| Rosenfeld 1996                                                                                             | 2              | 65    | 1       | 63    | 0.2%               | 1.65 [0.16, 17.82]   | 1996 |            |                     |
| Aaronson 1998                                                                                              | 1              | 13    | 1       | 13    | 0.2%               | 1.00 [0.06, 17.90]   | 1998 |            |                     |
| Schwartz 1999                                                                                              | 1              | 28    | 0       | 28    | 0.2%               | 1.07 [0.06, 18.08]   | 1999 |            |                     |
| Mahes 2002                                                                                                 | 1              | 62    | 1       | 66    | 0.2%               | 1.07 [0.07, 17.41]   | 2002 |            |                     |
| Buckingham 2002                                                                                            | 1              | 22    | 1       | 19    | 0.2%               | 0.89 [0.05, 16.71]   | 2002 |            |                     |
| Eliot 2004                                                                                                 | 1              | 99    | 1       | 98    | 0.2%               | 0.89 [0.06, 16.05]   | 2004 |            |                     |
| Miyama-Kizza 2005                                                                                          | 1              | 93    | 1       | 94    | 0.2%               | 1.01 [0.06, 16.40]   | 2005 |            |                     |
| Christensen 2005                                                                                           | 1              | 23    | 1       | 23    | 0.2%               | 1.00 [0.06, 17.02]   | 2005 |            |                     |
| Huang 2006                                                                                                 | 1              | 35    | 1       | 35    | 0.2%               | 1.00 [0.06, 16.65]   | 2006 |            |                     |
| Franco 2007                                                                                                | 1              | 380   | 1       | 381   | 0.2%               | 1.00 [0.06, 16.89]   | 2007 |            |                     |
| Luo 2007                                                                                                   | 1              | 43    | 1       | 43    | 0.2%               | 1.00 [0.06, 16.52]   | 2007 |            |                     |
| Medar 2007                                                                                                 | 1              | 63    | 0       | 28    | 0.2%               | 1.37 [0.05, 34.82]   | 2007 |            |                     |
| Phu 2009                                                                                                   | 1              | 200   | 1       | 201   | 0.2%               | 1.01 [0.06, 16.18]   | 2009 |            |                     |
| Muruges 2010                                                                                               | 1              | 55    | 1       | 55    | 0.2%               | 1.00 [0.06, 16.40]   | 2010 |            |                     |
| Shrager 2010                                                                                               | 1              | 104   | 1       | 109   | 0.2%               | 1.00 [0.06, 16.80]   | 2010 |            |                     |
| Fernandez-Serrano 2011                                                                                     | 1              | 28    | 0       | 28    | 0.2%               | 3.11 [0.12, 79.64]   | 2011 |            |                     |
| Subtotal (95% CI)                                                                                          | 1              | 1886  | 1649    | 6.3%  |                    | 1.13 [0.65, 1.95]    |      |            |                     |
| Total events                                                                                               | 28             |       | 23      |       |                    |                      |      |            |                     |
| Heterogeneity: Tau <sup>2</sup> = 0.00, Chi <sup>2</sup> = 1.45, df = 26 (P = 1.00); I <sup>2</sup> = 0%   |                |       |         |       |                    |                      |      |            |                     |
| Test for overall effect: Z = 0.43 (P = 0.67)                                                               |                |       |         |       |                    |                      |      |            |                     |
| <b>1.1.7 Rheumatoid arthritis</b>                                                                          |                |       |         |       |                    |                      |      |            |                     |
| Klein 1985                                                                                                 | 1              | 61    | 1       | 67    | 0.2%               | 1.10 [0.07, 17.98]   | 1985 |            |                     |
| Van Eerdwegen 2002                                                                                         | 1              | 41    | 2       | 40    | 0.3%               | 0.47 [0.04, 5.49]    | 2002 |            |                     |
| Kraus 2004                                                                                                 | 1              | 39    | 1       | 31    | 0.2%               | 0.79 [0.05, 13.15]   | 2004 |            |                     |
| Wassberg 2005                                                                                              | 1              | 94    | 1       | 88    | 0.2%               | 1.04 [0.06, 16.92]   | 2005 |            |                     |
| Chay 2006                                                                                                  | 1              | 48    | 1       | 43    | 0.2%               | 0.80 [0.05, 14.74]   | 2006 |            |                     |
| Subtotal (95% CI)                                                                                          | 1              | 283   | 279     | 1.3%  |                    | 0.86 [0.24, 2.69]    |      |            |                     |
| Total events                                                                                               | 5              |       | 6       |       |                    |                      |      |            |                     |
| Heterogeneity: Tau <sup>2</sup> = 0.00, Chi <sup>2</sup> = 0.27, df = 4 (P = 0.95); I <sup>2</sup> = 0%    |                |       |         |       |                    |                      |      |            |                     |
| Test for overall effect: Z = 0.36 (P = 0.72)                                                               |                |       |         |       |                    |                      |      |            |                     |
| <b>1.1.8 Miscellaneous</b>                                                                                 |                |       |         |       |                    |                      |      |            |                     |
| Hoffman 1984                                                                                               | 6              | 20    | 1       | 18    | 0.4%               | 7.29 [0.76, 67.90]   | 1984 |            |                     |
| Chambers                                                                                                   |                |       |         |       |                    |                      |      |            |                     |

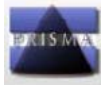

# PRISMA 2009 Checklist

| Section/topic                      | #  | Checklist item                                                                                                                                                                                                                                                                                              | Reported on page #                         |
|------------------------------------|----|-------------------------------------------------------------------------------------------------------------------------------------------------------------------------------------------------------------------------------------------------------------------------------------------------------------|--------------------------------------------|
| <b>TITLE</b>                       |    |                                                                                                                                                                                                                                                                                                             |                                            |
| Title                              | 1  | Identify the report as a systematic review, meta-analysis, or both.                                                                                                                                                                                                                                         | 1                                          |
| <b>ABSTRACT</b>                    |    |                                                                                                                                                                                                                                                                                                             |                                            |
| Structured summary                 | 2  | Provide a structured summary including, as applicable: background; objectives; data sources; study eligibility criteria, participants, and interventions; study appraisal and synthesis methods; results; limitations; conclusions and implications of key findings; systematic review registration number. | In the abstract                            |
| <b>INTRODUCTION</b>                |    |                                                                                                                                                                                                                                                                                                             |                                            |
| Rationale                          | 3  | Describe the rationale for the review in the context of what is already known.                                                                                                                                                                                                                              | 2                                          |
| Objectives                         | 4  | Provide an explicit statement of questions being addressed with reference to participants, interventions, comparisons, outcomes, and study design (PICOS).                                                                                                                                                  | 2                                          |
| <b>METHODS</b>                     |    |                                                                                                                                                                                                                                                                                                             |                                            |
| Protocol and registration          | 5  | Indicate if a review protocol exists, if and where it can be accessed (e.g., Web address), and, if available, provide registration information including registration number.                                                                                                                               | Yes, but cannot be accessed electronically |
| Eligibility criteria               | 6  | Specify study characteristics (e.g., PICOS, length of follow-up) and report characteristics (e.g., years considered, language, publication status) used as criteria for eligibility, giving rationale.                                                                                                      | 3                                          |
| Information sources                | 7  | Describe all information sources (e.g., databases with dates of coverage, contact with study authors to identify additional studies) in the search and date last searched.                                                                                                                                  | 3                                          |
| Search                             | 8  | Present full electronic search strategy for at least one database, including any limits used, such that it could be repeated.                                                                                                                                                                               | 3 + webfigure 2                            |
| Study selection                    | 9  | State the process for selecting studies (i.e., screening, eligibility, included in systematic review, and, if applicable, included in the meta-analysis).                                                                                                                                                   | 3                                          |
| Data collection process            | 10 | Describe method of data extraction from reports (e.g., piloted forms, independently, in duplicate) and any processes for obtaining and confirming data from investigators.                                                                                                                                  | 4                                          |
| Data items                         | 11 | List and define all variables for which data were sought (e.g., PICOS, funding sources) and any assumptions and simplifications made.                                                                                                                                                                       | 4                                          |
| Risk of bias in individual studies | 12 | Describe methods used for assessing risk of bias of individual studies (including specification of whether this was done at the study or outcome level), and how this information is to be used in any data synthesis.                                                                                      | 3, 4                                       |
| Summary measures                   | 13 | State the principal summary measures (e.g., risk ratio, difference in means).                                                                                                                                                                                                                               | 4                                          |

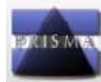

# PRISMA 2009 Checklist

1  
2  
3  
4  
5  
6  
7  
8  
9  
10  
11  
12  
13  
14  
15  
16  
17  
18  
19  
20  
21  
22  
23  
24  
25  
26  
27  
28  
29  
30  
31  
32  
33  
34  
35  
36  
37  
38  
39  
40  
41  
42  
43  
44  
45  
46  
47  
48  
49

|                      |    |                                                                                                                                                           |   |
|----------------------|----|-----------------------------------------------------------------------------------------------------------------------------------------------------------|---|
| Synthesis of results | 14 | Describe the methods of handling data and combining results of studies, if done, including measures of consistency (e.g., $I^2$ ) for each meta-analysis. | 4 |
|----------------------|----|-----------------------------------------------------------------------------------------------------------------------------------------------------------|---|

Page 1 of 2

| Section/topic                 | #  | Checklist item                                                                                                                                                                                           | Reported on page #                                            |
|-------------------------------|----|----------------------------------------------------------------------------------------------------------------------------------------------------------------------------------------------------------|---------------------------------------------------------------|
| Risk of bias across studies   | 15 | Specify any assessment of risk of bias that may affect the cumulative evidence (e.g., publication bias, selective reporting within studies).                                                             | 3                                                             |
| Additional analyses           | 16 | Describe methods of additional analyses (e.g., sensitivity or subgroup analyses, meta-regression), if done, indicating which were pre-specified.                                                         | 4                                                             |
| <b>RESULTS</b>                |    |                                                                                                                                                                                                          |                                                               |
| Study selection               | 17 | Give numbers of studies screened, assessed for eligibility, and included in the review, with reasons for exclusions at each stage, ideally with a flow diagram.                                          | 5 + fig.1                                                     |
| Study characteristics         | 18 | For each study, present characteristics for which data were extracted (e.g., study size, PICOS, follow-up period) and provide the citations.                                                             | Webfigure 1, Dataset available from the corresponding author. |
| Risk of bias within studies   | 19 | Present data on risk of bias of each study and, if available, any outcome level assessment (see item 12).                                                                                                | Dataset available from the corresponding author.              |
| Results of individual studies | 20 | For all outcomes considered (benefits or harms), present, for each study: (a) simple summary data for each intervention group (b) effect estimates and confidence intervals, ideally with a forest plot. | Fig.2 and webfigure1                                          |
| Synthesis of results          | 21 | Present results of each meta-analysis done, including confidence intervals and measures of consistency.                                                                                                  | Table 3                                                       |
| Risk of bias across studies   | 22 | Present results of any assessment of risk of bias across studies (see Item 15).                                                                                                                          | -                                                             |
| Additional analysis           | 23 | Give results of additional analyses, if done (e.g., sensitivity or subgroup analyses, meta-regression [see Item 16]).                                                                                    | Table 3                                                       |
| <b>DISCUSSION</b>             |    |                                                                                                                                                                                                          |                                                               |
| Summary of evidence           | 24 | Summarize the main findings including the strength of evidence for each main outcome; consider their relevance to key groups (e.g., healthcare providers, users, and policy makers).                     | 7                                                             |
| Limitations                   | 25 | Discuss limitations at study and outcome level (e.g., risk of bias), and at review-level (e.g., incomplete retrieval of identified research, reporting bias).                                            | 8                                                             |
| Conclusions                   | 26 | Provide a general interpretation of the results in the context of other evidence, and implications for future research.                                                                                  | 9                                                             |

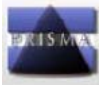

# PRISMA 2009 Checklist

| FUNDING |    |                                                                                                                                            |            |
|---------|----|--------------------------------------------------------------------------------------------------------------------------------------------|------------|
| Funding | 27 | Describe sources of funding for the systematic review and other support (e.g., supply of data); role of funders for the systematic review. | No funding |

From: Moher D, Liberati A, Tetzlaff J, Altman DG, The PRISMA Group (2009). Preferred Reporting Items for Systematic Reviews and Meta-Analyses: The PRISMA Statement. PLoS Med 6(6): e1000097. doi:10.1371/journal.pmed1000097

For more information, visit: [www.prisma-statement.org](http://www.prisma-statement.org).

Page 2 of 2

For peer review only

# BMJ Open

## Corticosteroids and risk of gastrointestinal bleeding: a systematic review and meta-analysis

|                                 |                                                                                                                                                                                                                                                                                                                                      |
|---------------------------------|--------------------------------------------------------------------------------------------------------------------------------------------------------------------------------------------------------------------------------------------------------------------------------------------------------------------------------------|
| Journal:                        | <i>BMJ Open</i>                                                                                                                                                                                                                                                                                                                      |
| Manuscript ID:                  | bmjopen-2013-004587.R1                                                                                                                                                                                                                                                                                                               |
| Article Type:                   | Research                                                                                                                                                                                                                                                                                                                             |
| Date Submitted by the Author:   | 23-Apr-2014                                                                                                                                                                                                                                                                                                                          |
| Complete List of Authors:       | Narum, Sigrid; Diakonhjemmet Hospital, Center for Psychopharmacology; Oslo University Hospital, Department of Pharmacology<br>Westergren, Tone; Oslo University Hospital, RELIS, Department of Pharmacology<br>Klemp, Marianne; Norwegian Knowledge Centre for the Health Services, ; University of Oslo, Department of Pharmacology |
| <b>Primary Subject Heading</b>: | Gastroenterology and hepatology                                                                                                                                                                                                                                                                                                      |
| Secondary Subject Heading:      | Epidemiology, Evidence based practice, Intensive care                                                                                                                                                                                                                                                                                |
| Keywords:                       | Gastroenterology < INTERNAL MEDICINE, Adverse events < THERAPEUTICS, Clinical trials < THERAPEUTICS, CLINICAL PHARMACOLOGY, EPIDEMIOLOGY                                                                                                                                                                                             |
|                                 |                                                                                                                                                                                                                                                                                                                                      |

SCHOLARONE™  
Manuscripts



1  
2  
3 **Corticosteroids and risk of gastrointestinal bleeding: a systematic review**  
4 **and meta-analysis**  
5  
6

7 Sigrid Narum,<sup>1</sup> Tone Westergren,<sup>2</sup> Marianne Klemp<sup>3</sup>  
8  
9  
10

11 <sup>1</sup>Centre for Psychopharmacology, Diakonhjemmet Hospital, PO Box 85 Vinderen, N-0319  
12 Oslo, Norway and Department of Pharmacology, Oslo University Hospital, Oslo, Norway.  
13

14 <sup>2</sup>Regional Medicines Information & Pharmacovigilance Centre (RELIS), Department of  
15 Pharmacology, Oslo University Hospital, Oslo, Norway.  
16

17 <sup>3</sup>Norwegian Knowledge Centre for the Health Services, Oslo, Norway and Department of  
18 Pharmacology, University of Oslo, Norway.  
19  
20

21  
22  
23 Correspondence to: S Narum [sigrid.narum@diakonsyk.no](mailto:sigrid.narum@diakonsyk.no), Contact address: Centre for  
24 Psychopharmacology, Diakonhjemmet Hospital, PO Box 85 Vinderen, N-0319 Oslo, Norway  
25  
26 Telephone: +47 22 45 46 45  
27  
28  
29  
30  
31  
32

33 Key words: gastrointestinal haemorrhage, peptic ulcer perforation, glucocorticoids,  
34 pharmacovigilance, systematic review, meta-analysis  
35  
36

37 Word count main text: 3435 words  
38  
39  
40  
41  
42  
43  
44  
45  
46  
47  
48  
49  
50  
51  
52  
53  
54  
55  
56  
57  
58  
59  
60

## ABSTRACT

**Objective:** To assess whether corticosteroids are associated with increased risk of gastrointestinal bleeding or perforation.

**Design:** Systematic review and meta-analysis of randomised, double-blind, controlled trials comparing a corticosteroid to placebo for any medical condition or in healthy subjects. Studies with steroids given either locally, as single dose or in crossover studies were excluded.

**Data sources:** Literature search using Medline, Embase and Cochrane Database of Systematic Reviews between 1983 and 22<sup>th</sup> May 2013.

**Outcome measure:** Outcome measures were the occurrence of gastrointestinal bleeding or perforation. Predefined subgroup analyses were done for disease severity, use of NSAIDs or gastroprotective drugs, and history of peptic ulcer.

**Results:** 159 studies (N= 33 253) were included. In total, 804 (2.4%) patients had a gastrointestinal bleeding or perforation (2.9% and 2.0% for corticosteroids and placebo). Corticosteroids increased the risk of gastrointestinal bleeding or perforation by 40% (OR 1.43, 95% CI 1.22 to 1.66). The risk was increased for hospitalized patients (OR 1.42, 95% CI 1.22 to 1.66). For patients in ambulatory care, the increased risk was not statistically significant (OR 1.63, 95% CI 0.42 to 6.34). Only 11 gastrointestinal bleeds or perforations occurred among 8 651 patients in ambulatory care (0.13%).

Increased risk was still present in subgroup analyses (studies with NSAID use excluded; OR 1.44, 95% CI 1.20 to 1.71, peptic ulcer as exclusion criterion excluded; OR 1.47, 95% CI 1.21 to 1.78, and use of gastroprotective drugs excluded; OR 1.42, 95% CI 1.21 to 1.67).

**Conclusion:** Corticosteroid use was associated with increased risk of gastrointestinal bleeding and perforation. The increased risk was statistically significant for hospitalized patients only. For patients in ambulatory care, the total occurrence of bleeding or perforation was very low, and the increased risk was not statistically significant.

## ARTICLE SUMMARY

### Article focus

- The present systematic review aims to explore if systemic corticosteroids are associated with increased risk of gastrointestinal bleeding or perforation.

### Key messages

- The current systematic review indicates that disease severity might influence the risk of gastrointestinal bleeding or perforation by corticosteroid use.
- Statistically significant increased risk of gastrointestinal bleeding or perforation was limited to hospitalized patients. Patients in ambulatory care had a very low occurrence of gastrointestinal bleeding or perforation and the increased risk was not statistically significant.
- **Strengths and limitations of this study**
- The strength of this systematic review is the size due to inclusion of a large number of randomized controlled trials that allowed for subgroup analyses.
- Limitations are the possible loss of relevant studies due to the selected search strategy, the quality of adverse event reporting in the primary studies and the heterogeneity in the patient populations.

## INTRODUCTION

The association between corticosteroid use and gastrointestinal adverse effects, including bleeding or perforation, has been a source of debate since the 1950s.<sup>1-3</sup> Since gastrointestinal bleeding and perforation are rare events, no single randomised controlled trial have been large enough to show any increased risk for GI bleeding with the use of corticosteroids.

Adverse effects and studies of rare events can often be effectively investigated in observational studies, thus controlled, observational studies may be the study of choice to detect rare adverse effects. For corticosteroid use, several observational studies have been performed to clarify whether corticosteroids do induce gastrointestinal bleeding or not, but there is still uncertainty whether this adverse effect is a result of corticosteroid use, use of other medications, underlying disease or other causes.<sup>4-7</sup>

This lack of evidence is reflected in the literature. In databases and in product monographs for corticosteroids, peptic ulcer disease and gastrointestinal bleeding may or may not be described as possible adverse effects.<sup>8-13</sup> Similarly, in clinical recommendations an association between corticosteroid use and peptic ulcer has been described as unlikely and the value of anti-ulcer prophylaxis has been questioned due to a low bleeding risk.<sup>8-13</sup> Though many gastroenterologists consider corticosteroids as not having ulcerogenic properties, a recent survey has shown that corticosteroids are still considered ulcerogenic by a majority of physicians and that a majority of practitioners would treat corticosteroid users with ulcer

1  
2  
3 prophylaxis.<sup>14</sup> This uncertainty may have consequences for clinical recommendations and  
4 treatment guidelines, and is the main reason why we performed this systematic review.<sup>15-18</sup>  
5  
6  
7

8 Gastrointestinal bleeding, bleeding peptic ulcer and perforation are feared complications of  
9 peptic ulcer disease, associated with considerable morbidity and mortality.<sup>19-20</sup> NSAID use  
10 and *Helicobacter pylori* infection are the most important risk factors for peptic ulcer disease.  
11 Bleeding or perforation is also seen as complications to stress ulcers among patients with  
12 critical illness in intensive care units. Gastrointestinal bleeding and perforation are assumed  
13 to occur when ulcers erode into underlying vessels. The mechanism by which corticosteroids  
14 might induce gastrointestinal bleeding or perforation has not been fully established, but  
15 corticosteroids may impair tissue repair, thus leading to delayed wound healing.<sup>8</sup> In addition,  
16 the anti-inflammatory and analgesic properties of corticosteroids may mask symptoms of  
17 gastroduodenal ulcers and ulcer complications and thus possibly delay diagnosis.  
18  
19  
20  
21  
22  
23  
24  
25

26 The aim of this systematic review was to examine whether use of systemic corticosteroids  
27 was associated with an increased risk of peptic ulcer complications such as gastrointestinal  
28 bleeding or perforation. Since observational studies have not been conclusive, we have  
29 chosen to include published studies with a randomized, controlled design.  
30  
31  
32  
33

## 34 **METHODS**

### 35 **Search strategy and selection criteria**

36 A systematic literature search was performed to identify randomized, double-blind, placebo  
37 controlled trials in which any systemic corticosteroid (defined as oral, intravenous, or  
38 intramuscular) or a placebo had been administered to randomly selected groups of patients in  
39 the treatment of a medical disorder or to healthy subjects.  
40  
41  
42  
43

44 We searched the databases MEDLINE and EMBASE with no language restrictions between  
45 1983 (since date of the latest review by Conn et al.)<sup>1</sup> and 30th June 2011 using the following  
46 text words: (betamethasone/ or dexamethasone/ or methylprednisolone/ or prednisolone/ or  
47 prednisone/ or triamcinolone/ or cortisone/ or hydrocortisone/) limited to randomized  
48 controlled trial, 1983 to 20110630, humans, double-blind.mp and placebo.mp. An updated  
49 search was performed 22<sup>nd</sup> May 2013. For the full search strategy, see supplementary file 1.  
50 An additional search was performed in the Cochrane Database of Systematic Reviews for  
51 corticosteroids and the following text words: Traumatic injury, sepsis/septic shock,  
52 meningitis, bronchopulmonary dysplasia, liver diseases, lung diseases and rheumatoid  
53  
54  
55  
56  
57  
58  
59  
60

1  
2  
3 arthritis. Only results fully reported in journal articles in English, German, or any  
4 Scandinavian language were considered for inclusion. Whenever a title or abstract suggested  
5 that a randomized, double-blind, placebo controlled trial comparing a corticosteroid to  
6 placebo had been performed, the full text version was reviewed for documentation of  
7 gastrointestinal adverse events. Articles with documentation of gastrointestinal adverse  
8 effects or with assessment of adverse event monitoring described in the methods section were  
9 included. Titles, abstracts, and full-text articles were evaluated and reviewed for inclusion by  
10 at least two of the authors. Disagreements were resolved by consensus among the reviewers.  
11  
12

13  
14  
15  
16  
17  
18 Methodological quality assessment of eligible trials was done by including only randomized,  
19 double-blind studies.<sup>21</sup> In most studies, there was no specific description of randomisation  
20 and allocation concealment, blinding methods, or handling of withdrawals. Authors'  
21 description of randomization and double-blinding was assumed to be valid. We used  
22 intention-to-treat data when available. All types of co-medications were allowed if  
23 administered systematically to both groups or as a part of standard care. No medical disorder  
24 or age groups were excluded. When medications known to induce gastrointestinal symptoms,  
25 such as non-steroidal anti-inflammatory drugs (NSAIDs) or acetylsalicylic acid (ASA) had  
26 been used, these medications were analysed as co-variables. We excluded trials with  
27 crossover design because of potential difficulties in assessment between the treatment groups.  
28 Trials in which the steroid was given as a single dose were also excluded due to generally  
29 short follow up.  
30  
31  
32  
33  
34  
35  
36  
37  
38

### 39 **Data extraction and outcomes reporting**

40  
41 For the diagnosis of complications of gastroduodenal ulcers, such as occult or visible blood in  
42 stool, gastrointestinal bleeding, haematemesis, melena, and gastrointestinal perforation, the  
43 investigators' diagnoses were accepted as valid without requiring specific criteria or methods.  
44 Outcomes like dyspepsia, gastritis, duodenitis, and epigastric pain were not included, nor  
45 were necrotizing enterocolitis. For assessment of gastrointestinal bleeding or perforation as  
46 an adverse effect, the number of events should be reported in the results section as text or in a  
47 table. Events reported as percentages only, were calculated into numbers by us. In some  
48 trials, other adverse effects were reported in the results section but no gastrointestinal  
49 bleeding was listed. These studies were included only if adverse event monitoring was  
50 described in the methods section or if it was judged reasonable to expect from the adverse  
51 event monitoring system that any gastrointestinal adverse effects would have been recorded.  
52  
53  
54  
55  
56  
57  
58  
59  
60

1  
2  
3 We recorded information on study characteristics and demographics such as publication year,  
4 corticosteroid use, indication for treatment, use of concomitant medications, description of  
5 adverse effect, study size, duration of treatment and follow up. Severity of disease was  
6 assessed, by assuming that patients needing hospitalisation were sicker than patients in  
7 ambulatory care. Information regarding exclusion from study by ongoing, recent or a history  
8 of peptic ulcer disease were also recorded. Risk of bias was assessed by recording which  
9 methods that were used for monitoring, definition and description of adverse effects,  
10 randomization, and selection criteria.  
11  
12  
13  
14  
15  
16  
17

### 18 **Statistical analysis**

19 The relative frequencies of the adverse effects were compared in the placebo and the  
20 corticosteroid group(s) using conventional statistics and meta-analysis. Subgroup analyses  
21 were performed for different predefined variables, such as for concomitant NSAIDs use, for  
22 use of gastroprotective drugs (proton pump inhibitors, H2 blockers, or antacids), and for  
23 disease severity.  
24  
25  
26  
27

28 All meta-analytic calculations were made with RevMan (version 5.2) using the Mantel-  
29 Haenszel method with random effects model. For other statistics, SPSS (version 20) was  
30 used. For binary outcomes, we calculated odds ratios (OR) and 95 % confidence intervals.  
31 All analyses were two-tailed, with  $\alpha$  of 0.05.  
32  
33  
34  
35

## 36 **RESULTS**

### 37 **Literature search and study selection**

38 The search process identified 3483 records from database searches and fifteen studies were  
39 retrieved by hand searching. A total of 159 articles fitted our inclusion criteria and were  
40 included in the review. Further details regarding study inclusion and exclusion are shown in  
41 figure 1. We performed an updated search 22<sup>nd</sup> May 2013 and retrieved 3 additional studies  
42 reporting confirmed gastrointestinal bleeding events. The new studies did not change the  
43 results.  
44  
45  
46  
47  
48  
49  
50

### 51 **Characteristics of included studies**

52 In this systematic review 159 studies were included. The main medical conditions were  
53 severe infections, lung diseases, traumatic injuries, and prevention of bronchopulmonary  
54 dysplasia in premature infants. Further details regarding the disease groups are shown in table  
55 1.  
56  
57  
58  
59  
60

Table 1: Medical conditions in which corticosteroids were tested, with number of studies, number of participants, and number of adverse effects. Grouping by treatment level was based on statements in the reports and, if there was no indication of treatment level, on clinical judgement. Patients with traumatic injury, meningitis, sepsis/septic shock, and bronchopulmonary dysplasia were defined as hospitalized.

| Disease                                         | Hospitalized      |                        |       |                           |      | Ambulant          |                        |      |                           |      | Total                  |
|-------------------------------------------------|-------------------|------------------------|-------|---------------------------|------|-------------------|------------------------|------|---------------------------|------|------------------------|
|                                                 | Number Of studies | Number of participants |       | Number of adverse effects |      | Number of studies | Number of participants |      | Number of Adverse effects |      | Number of participants |
|                                                 |                   | Ster                   | Plac  | Ster                      | Plac |                   | Ster                   | Plac | Ster                      | Plac |                        |
| Traumatic injury (brain, spinal cord, multiple) | 9                 | 5821                   | 5790  | 95                        | 75   | 0                 | -                      | -    | -                         | -    | 11611                  |
| Meningitis                                      | 18                | 1589                   | 1549  | 110                       | 91   | 0                 | -                      | -    | -                         | -    | 3138                   |
| Sepsis / septic shock                           | 7                 | 482                    | 449   | 32                        | 28   | 0                 | -                      | -    | -                         | -    | 931                    |
| Bronchopulmonary dysplasia                      | 21                | 1508                   | 1487  | 155                       | 85   | 0                 | -                      | -    | -                         | -    | 2995                   |
| Liver diseases *                                | 4                 | 150                    | 114   | 26                        | 15   | 3                 | 705                    | 709  | 5                         | 1    | 1678                   |
| Lung diseases %                                 | 20                | 1149                   | 1105  | 8                         | 3    | 7                 | 537                    | 544  | 0                         | 0    | 3335                   |
| Rheumatoid arthritis                            | 0                 | -                      | -     | -                         | -    | 5                 | 283                    | 279  | 1                         | 2    | 562                    |
| Miscellaneous #                                 | 24                | 1743                   | 1666  | 46                        | 24   | 41                | 2806                   | 2788 | 2                         | 0    | 9003                   |
| Sum                                             | 103               | 12442                  | 12160 | 472                       | 321  | 56                | 4331                   | 4320 | 8                         | 3    | 33253                  |

Ster = corticosteroids, Plac= placebo. \* Hepatitis, liver cirrhosis, acute hepatic failure. % Asthma, ARDS, bronchiolitis, chronic obstructive pulmonary disease, pneumonia, tuberculosis, ventilator weaning. # Miscellaneous diseases as stated in the original reports (number of studies in brackets): Acute otitis media, adhesive capsulitis, allergic rhinitis, Alzheimer's disease, Bechets syndrome, Bell's palsy (2), carpal tunnel syndrome, cerebral infarction, chronic fatigue syndrome, coronary artery bypass grafting (2), cysticercus granuloma with seizures, depression, Duchenne's muscular dystrophy, emesis (9), erysipelas, facial nerve paralysis (2), glaucoma, Grave's orbitopathy, Guillain-Barré syndrome (2), healthy postmenopausal women, Henoch Schonlein purpura (2), herpes zoster (3), IgA nephropathy, intracerebral hemorrhage (2), leprosy, lumbar disc surgery, migraine headaches, multiple sclerosis (3), myocardial infarction (2), post-infectious irritable bowel syndrome, preeclampsia, (pre)terminal cancer (2), aphthous stomatitis, sinonasal polyposis, sinusitis, Sjögren's syndrome, Sydenham's Chorea children, tetanus, tonsillectomy (2), tuberculous pericarditis in HIV, typhoid fever, urticaria, vestibular neuritis, withdrawal headache.

The corticosteroids used were dexamethasone (55), prednisolone (30), methylprednisolone (29), prednisone (22), hydrocortisone (16), and other steroids or combinations (7). The sample size ranged from 15 to 10 008 people, with a median sample size of 86. The median duration of treatment was 8.5 days (range 1 to 1095 days), and the median follow-up period was 56 days (range 1 to 1155 days). There was a trend towards shorter duration of treatment and follow up during hospital treatment (6.0 and 33 days) compared to ambulant treatment (14 and 58 days) ( $p=0.061$  and  $p=0.057$ , respectively). The adverse effects were described as any form of bleeding in 59 studies (upper /lower, minor, haematemesis, melena, visible/occult blood in stool), perforation in 7 studies (perforated gastric ulcer, ileum perforation), and both bleeding and perforation in 6 studies. The definition of gastrointestinal



1  
2  
3 bleeding varied between the studies, from bleeding requiring transfusion to occult blood in  
4 stool (bronchopulmonary dysplasia).

5  
6 Altogether, 72 (45.3%) studies reported gastrointestinal bleeding or perforation as an adverse  
7 effect (67 hospitalized, 5 ambulant). In the 87 studies without reporting of any  
8 gastrointestinal bleeding or perforation, peptic ulcer was described in only four studies.  
9  
10

11  
12 Use of concomitant medication was described in 135 studies (84.9%). In addition, use of  
13 concomitant medication was likely in many of the remaining 24 studies, as a consequence of  
14 diagnoses such as ARDS, bronchopulmonary dysplasia, and traumatic injury to head or spine.  
15 Use of medication for any pre-existing diseases was sparsely described. Concomitant use of  
16 NSAIDs /ASA was described in 19 studies (bronchopulmonary dysplasia, rheumatoid  
17 arthritis, miscellaneous and sepsis in 9, 5, 4, and 1 study, respectively), and use of  
18 gastroprotective drugs was described in 14 studies. In addition, use of concomitant drugs  
19 “according to standard clinical practice” etc., which may potentially include use of  
20 gastroprotective drugs, was described in 12 studies.  
21  
22  
23  
24  
25  
26  
27  
28

29  
30 Peptic ulcer; ongoing, recent or previous, was an exclusion criteria in 53 (33.3%) of the  
31 studies. In the majority of studies (85, 53.5%), the authors reported no effect of  
32 corticosteroids on the primary efficacy endpoint. Study specific characteristics are shown in  
33 table 2 and supplementary file 2.  
34  
35  
36  
37  
38  
39  
40  
41  
42  
43  
44  
45  
46  
47  
48  
49  
50  
51  
52  
53  
54  
55  
56  
57  
58  
59  
60



Table 2: Study specific characteristics

| Summary of study characteristics    | Studies total     | Studies with bleeding | Studies without bleeding | p-values  |
|-------------------------------------|-------------------|-----------------------|--------------------------|-----------|
| Studies included (%)                | 159               | 72 (45.3)             | 87 (54.7)                |           |
| Year of publication, median         |                   | 1998                  | 1999                     | (p=0.109) |
| Description of adverse effect (%)   |                   |                       |                          |           |
| Bleeding                            |                   | 59 (81.9)             | 0                        |           |
| Perforation                         |                   | 7 (9.7)               | 0                        |           |
| Bleeding and perforation            |                   | 6 (8.3)               | 0                        |           |
| Peptic ulcer only                   |                   |                       | 4                        |           |
| Level of care (%)                   |                   |                       |                          |           |
| Hospitalized                        | 103               | 67 (93.1)             | 36 (41.4)                | (p<0.001) |
| Ambulant                            | 56                | 5 (6.9)               | 51 (58.6)                |           |
| Use of concomitant medication (%)   |                   |                       |                          |           |
| No concomitant medication described | 24                | 11 (15.3)             | 13 (14.9)                |           |
| Concomitant medication described    | 135               | 61 (84.7)             | 74 (85.1)                |           |
| - NSAIDs / ASA                      | 19                | 11 (15.3)             | 8 (9.2)                  | (p=0.326) |
| - Gastroprotective drugs            | 14                | 12                    | 2                        | (p=0.002) |
| Exclusion criteria (%)              |                   |                       |                          |           |
| Recent / ongoing peptic ulcer       | 36                | 14 (19.4)             | 22 (25.3)                | (p=0.237) |
| Previous / history of peptic ulcer  | 17                | 6 (8.3)               | 11 (12.6)                |           |
| Study size, number of participants  |                   |                       |                          |           |
| Median (IQR)                        | 86 (49.0 - 181.0) | 100 (60.3 - 246.5)    | 70 (40.0 - 128.0)        | (p=0.104) |
| Duration of treatment, days         |                   |                       |                          |           |
| Median (IQR)                        | 8.5 (3.3 - 28.0)  | 6.0 (3.0 - 12.0)      | 14 (4.0 - 45.0)          | (p=0.061) |
| Duration of follow up, days         |                   |                       |                          |           |
| Median (IQR)                        | 56 (21.0 - 243.8) | 33 (21.0 - 180.0)     | 58 (19.5 - 286.5)        | (p=0.057) |

NSAIDs= nonsteroidal antiinflammatory drugs, ASA= acetylsalicylic acid, PPIs= proton pump inhibitors, IQR= interquartile range

### Risk of gastrointestinal bleeding or perforation

The analysis included 33 253 participants (16 773 received corticosteroids and 16 480 received placebo). Of those, 804 patients (480 receiving a corticosteroid and 324 receiving a placebo) were reported to have a gastrointestinal bleeding or perforation, which comprises 2.4 % of the study participants (2.9% and 2.0% for corticosteroids and placebo, respectively). Overall, meta-analysis of all the included studies showed a 40% increased odds ratio of experiencing gastrointestinal bleeding or perforation among corticosteroid users compared to placebo users (odds ratio 1.43, 95% confidence interval 1.22 to 1.66) (figure 2, and supplementary file 3). Subgroup analysis for each disease group showed a trend towards an increased risk of gastrointestinal bleeding or perforation in seven out of eight subgroups, but the result was statistically significant only for premature infants in prevention of bronchopulmonary dysplasia (1.83, 1.37 to 2.43).

### Sensitivity analyses

Data from subgroup analyses are shown in table 3.

Table 3: Summary of subgroup analyses

|                                                    | Number of studies | Number of patients | Odds ratio (95 % CI) | Events steroids/ placebo | Events per 1000 patients steroids / placebo |
|----------------------------------------------------|-------------------|--------------------|----------------------|--------------------------|---------------------------------------------|
| Hospitalized                                       | 103               | 24 602             | 1.42 (1.22 - 1.66)   | 472 / 321                | 37.9 / 26.4                                 |
| Ambulant                                           | 56                | 8 651              | 1.63 (0.42 - 6.34)   | 8 / 3                    | 1.8 / 0.7                                   |
| NSAID use not documented                           | 140               | 30 874             | 1.44 (1.20 - 1.71)   | 372 / 248                | 23.9 / 16.2                                 |
| NSAID use documented                               | 19                | 2 379              | 1.30 (0.81 - 2.07)   | 108 / 76                 | 90.2 / 64.4                                 |
| Peptic ulcer as exclusion criterion not documented | 106               | 25 760             | 1.47 (1.21 - 1.78)   | 421 / 284                | 32.5 / 22.1                                 |
| Peptic ulcer as exclusion criterion documented     | 53                | 7 493              | 1.26 (0.81 - 1.96)   | 59 / 40                  | 15.4 / 10.9                                 |
| Gastroprotective drugs not documented              | 145               | 31 759             | 1.42 (1.21 - 1.67)   | 442 / 299                | 27.6 / 19.0                                 |
| Gastroprotective drugs documented                  | 14                | 1 494              | 1.29 (0.62 - 2.69)   | 38 / 25                  | 50.6 / 33.6                                 |
| Bronchopulmonary dysplasia excluded                | 138               | 30 258             | 1.29 (1.07 - 1.55)   | 325 / 239                | 21.3 / 15.9                                 |

1  
2  
3  
4  
5 Subgroup analysis of studies with hospitalized patients showed an increased risk of  
6 developing gastrointestinal bleeding or perforation (odds ratio 1.42, 95% confidence interval  
7 1.22 to 1.66). There was also a trend towards increased risk for patients in ambulatory care  
8 (1.63, 0.42 to 6.34), but this result was not significant. When the studies with documentation  
9 of concomitant NSAID use were excluded, a significant difference between corticosteroid  
10 and placebo with respect to gastrointestinal bleeding or perforation was still present (1.44,  
11 1.20 to 1.71). When all studies of premature infants in prevention of bronchopulmonary  
12 dysplasia were excluded from the analysis (assuming NSAIDs were given in all studies), the  
13 results were lower, but still significant (1.29, 1.07 to 1.55). When studies with peptic ulcer as  
14 exclusion criterion and studies with concomitant use of gastroprotective drugs were  
15 subsequently excluded from the analyses, there were little change in the risk of bleeding or  
16 perforation in the remaining studies (table 3). The majority of the adverse effects occurred in  
17 hospitalized patients. Only 11 gastrointestinal bleedings or perforations occurred among 8  
18 651 patients in ambulatory care (0.13%), compared to 793 gastrointestinal bleeds or  
19 perforations among 24 602 hospitalized patients (3.22%) ( $p < 0.001$ )(table 1). The absolute  
20 risk of experiencing GI-bleeding, events per 1000 patients were 1.8 for ambulant patients  
21 given steroids, compared to 0.7 for ambulant patients given placebo (table 3). In contrast,  
22 hospitalized patients had a much higher risk, 37.9/1000 for steroids and 26.4/1000 for  
23 placebo.

## 34 35 36 37 38 **DISCUSSION**

39 The overall findings of this systematic review show that use of corticosteroids may increase  
40 the odds ratio by 40% for gastrointestinal bleeding or perforation. The increased risk,  
41 however, was limited to hospitalized patients. For patients in ambulatory care, who had a  
42 very low absolute occurrence of gastrointestinal bleeding or perforation, the increased risk  
43 was not statistically significant. The results persisted when high/low risk patients  
44 (concomitant NSAID use, previous peptic ulcer as exclusion criterion, and use of  
45 gastroprotective drugs) were excluded, indicating the robustness of the results.

### 46 47 48 49 50 51 52 53 **Comparison with other studies**

54 Previously published meta-analyses addressing whether corticosteroid use predispose for  
55 gastrointestinal bleeding or perforation have shown conflicting results.<sup>1-3</sup> In two meta-  
56 analyses, Conn et al. concluded that there was no increased risk of peptic ulcer,  
57  
58  
59  
60

1  
2  
3 gastrointestinal bleeding or perforation by corticosteroid use.<sup>1 2</sup> In contrast, Messer et al.  
4 found an increased incidence of both peptic ulcer and gastrointestinal bleeding.<sup>3</sup> In a  
5 subgroup analysis by Conn,<sup>2</sup> however, there was a significantly higher rate of gastrointestinal  
6 bleeding from an unknown site among corticosteroid users compared to controls. In his  
7 second paper, steroid users had more gastrointestinal adverse effects (ulcers, symptoms of  
8 ulcers, bleeding, erosions and perforation) than the controls, but because of subgroup  
9 analyses only and no pooling of results, no differences emerged as statistically significant.<sup>1</sup>  
10 These meta-analyses of randomized controlled trials, which included published literature up  
11 to 1983, show how different inclusion criteria, selection criteria, data handling and  
12 interpretation of results may give totally different results and conclusions. Newer Cochrane  
13 meta-analyses have addressed the question in selective patient populations (meningitis,  
14 traumatic brain injury, and preterm infants). These analyses show a trend<sup>22-24</sup> or a statistically  
15 significant increase<sup>25</sup> in risk ratio of experiencing gastrointestinal bleeding, with the included  
16 studies and results similar to the subgroups in our study.  
17

18  
19 In our study we included the literature published from 1983 up to date. With 33 253  
20 participants from double-blind, randomized, controlled trials, this is the largest meta-analysis  
21 analysing whether corticosteroids increase the risk of gastrointestinal bleeding. Due to the  
22 large size of our study, findings that were seen as trends in other reviews or went unnoticed  
23 because of many subgroup analyses have emerged as a significant increase in risk, despite  
24 non-significant occurrence in all subgroups except prevention of bronchopulmonary  
25 dysplasia in premature infants. Surprisingly, peptic ulcers were hardly listed as an adverse  
26 effect in the included studies, in contrast to the studies in the previous reviews by Conn and  
27 Messer. One explanation may be the differences in disease panorama and the discovery and  
28 treatment of *Helicobacter Pylori*. The true occurrence of peptic ulcer may also have been  
29 underestimated in the studies because of heavy medication and intensive care treatment.  
30  
31  
32  
33  
34  
35  
36  
37  
38  
39  
40  
41  
42  
43  
44  
45

### 46 **Strengths and limitations of this review**

47  
48 In many reviews, use of narrow inclusion criteria and wide exclusion criteria make the  
49 population homogeneous, but with rare events there is a high risk of insignificant results. In  
50 our analysis, inclusion of all studies with a relevant design, including those with concomitant  
51 medications and studies with zero events may reflect more realistic treatment conditions and  
52 may contribute to the validity of the findings. Due to the large size of included studies in our  
53 review we were able to perform predefined subgroup analyses assessing severity of disease  
54 (ie assessed as hospitalized or as ambulant treatment), use of NSAIDs or gastroprotective  
55  
56  
57  
58  
59  
60

1  
2  
3 drugs, and documentation of peptic ulcer as exclusion criterion. To our knowledge, this is the  
4 first systematic review to indicate that disease severity might influence the risk of  
5 gastrointestinal bleeding or perforation in corticosteroid users.  
6  
7

8  
9 The main limitations of this review are the possible loss of relevant studies due to the selected  
10 search strategy, the quality of the included trials, and the heterogeneity of the included patient  
11 populations. However, we believe the findings to be robust, despite this, due to the large  
12 number of included studies and participants. Randomized controlled trials are designed to  
13 show effect of treatment, not to detect adverse effects, which in many studies were sparsely  
14 reported or not reported at all. However, since we included only double-blind studies with  
15 placebo control, we suspect similar under-reporting in both study groups. To minimize risk of  
16 bias according to adverse effect detection and reporting, we recorded the methods used for  
17 monitoring adverse effects and how the adverse effect was defined. We found diversity in the  
18 definitions of gastrointestinal bleeding (i.e. from occult blood in stool to gastrointestinal  
19 bleeding requiring transfusion or hospital stay). In addition, differences in methods used for  
20 monitoring adverse effects may explain the risk differences found in the sensitivity analyses.  
21 More rigorous follow up of patients in intensive care units may thus explain some of the risk  
22 differences found between hospitalized patients and patients in ambulatory care. This makes  
23 comparisons of absolute risk differences between different disease groups difficult.  
24  
25  
26  
27  
28  
29  
30  
31  
32  
33  
34

35 We aimed to include all disease groups, but still some groups may be under-represented (i.e  
36 rheumatoid arthritis, organ transplanted patients) since corticosteroid use is standard  
37 treatment and no longer compared to placebo in randomized controlled trials. Patients  
38 included in randomized controlled trials may differ from patients excluded from trial  
39 participation, and may be healthier, without previous peptic ulcer. This may underestimate  
40 the true effect of corticosteroids on gastrointestinal bleeding and perforation within the  
41 population. In the majority of the included studies, use of concomitant medications was  
42 described. Concomitant medication was related to the study indication (e.g. treatment of  
43 trauma, meningitis, sepsis, BPD etc.), in contrast to medications for co-existing diseases,  
44 which were hardly mentioned. Concomitant use of gastroprotective drugs and descriptions of  
45 supportive care according to standard clinical practice, which may include use of  
46 gastroprotective drugs, was declared only in a minority of the studies. In addition, potential  
47 under-reporting and undisclosed use of gastroprotective drugs may have underestimated the  
48 true risk of having GI-bleeding with steroid use. Undisclosed use of gastroprotective drugs  
49  
50  
51  
52  
53  
54  
55  
56  
57  
58  
59  
60

1  
2  
3 may especially apply to ambulant treated patients with dyspepsia. Because of short term  
4 treatment and inclusion of only double-blind studies we assume that the effect of possible  
5 under-reporting and undisclosed use of gastroprotective drugs was not substantial. Despite  
6 the heterogeneity of the included studies and a potential of under-reporting of adverse effects,  
7 there is a consistency across the analyses of an increased frequency of gastrointestinal  
8 bleeding and perforation among patients given steroids compared to patients given placebo.  
9 This indicates robustness of the analysis.  
10  
11  
12  
13

### 14 15 16 17 18 **Clinical implications of this review**

19 Our analysis show that the increased risk of gastrointestinal bleeding or perforation applied to  
20 hospitalized patients only, indicating that additional factors to corticosteroid therapy, such as  
21 disease severity or advanced medical treatment may make some patients more vulnerable to  
22 adverse events to corticosteroid use. One possible explanation is that the bleedings and  
23 perforations seen among hospitalized patients may be complications to the stress ulcers seen  
24 in critically ill patients.  
25  
26  
27  
28

29 Due to diagnoses or illnesses like traumatic injury, meningitis, and sepsis we suspected a  
30 substantial portion of the hospitalized patients to have been critically ill. To scrutinize this  
31 further we aimed to do separate analyses of critically ill patients or treatment in intensive care  
32 units, but lack of descriptions of critical illness or treatment in intensive care units in the  
33 included studies made us use hospitalization and ambulant treatment as surrogate markers for  
34 disease severity.  
35  
36  
37  
38

39 Stress ulcers occur in response to severe physiologic stress in critically ill patients. Although  
40 the mechanism is not completely understood, it involves decreased mucosal blood flow and  
41 subsequent tissue ischemia, resulting in breakdown of mucosal defences, allowing  
42 physiological factors to produce injury and ulceration.<sup>26</sup> Many risk factors for stress ulcer  
43 bleeding have been proposed,<sup>26 27</sup> but only mechanical ventilation and coagulopathy have  
44 been documented as independent risk factors. Despite this evidence, several studies have  
45 shown that acid-suppressive therapy is used as stress ulcer prophylaxis in both hospital wards  
46 and outpatient settings.<sup>15-17</sup> This has been described as an inappropriate use of acid-  
47 suppressive therapy. An explanation to this overuse may be the discrepancy between product  
48 monographs and databases/clinical recommendations in assessment of peptic ulcer disease  
49 and gastrointestinal bleeding as possible adverse effects to corticosteroids.<sup>8 11-13</sup>  
50  
51  
52  
53  
54  
55  
56  
57  
58  
59  
60

1  
2  
3 Our analysis also showed increased risk of gastrointestinal bleeding or perforation among  
4 patients in ambulatory care, but the result was not significant due to a very low occurrence of  
5 gastrointestinal bleeding and perforation. According to our results, there is insufficient data to  
6 conclude whether corticosteroids are associated with gastrointestinal bleeding or perforation  
7 among patients in ambulatory care. It seems reasonable to conclude that the absolute risk of  
8 gastrointestinal bleeding is very low in the ambulatory setting.  
9  
10  
11  
12

13  
14  
15  
16 Data sharing: Dataset available from the corresponding author.

17  
18 Contributors: SN, TW and MK conceived the study, performed the systematic review, data extraction,  
19 analysed the data, and drafted the manuscript. All authors had full access to the data and take  
20 responsibility for the integrity of the data and accuracy of the analysis. SN is guarantor.  
21

22 Funding: None.

23  
24 Competing interests: All authors have completed the ICMJE uniform disclosure form at  
25 [www.icmje.org/coi\\_disclosure.pdf](http://www.icmje.org/coi_disclosure.pdf) and declare: no support from any organisation for the submitted  
26 work; no financial relationships with any organisations that might have an interest in the submitted  
27 work in the previous three years; no other relationships or activities that could appear to have  
28 influenced the submitted work.  
29

30  
31 Ethical approval: Not required.  
32  
33

34  
35 Figure texts and titles

36  
37 Figure 1: Flowchart for the selection of eligible studies  
38

39  
40 Figure 2: Summary of pooled results.

41 Gastrointestinal bleeding in corticosteroid users versus placebo users.  
42 The Mantel-Haenszel (M-H) method with random effects model was used.  
43

44  
45 Supplementary file 1: Search strategy - Medline  
46

47  
48 Supplementary file 2: Study characteristics  
49

50  
51 Supplementary file 3: Forest plot of all trials.

52 Gastrointestinal bleeding in corticosteroid users versus placebo users.  
53 The Mantel-Haenszel (M-H) method with random effects model was used.  
54  
55  
56  
57  
58  
59  
60



## REFERENCES

1. Conn HO, Poynard T. Corticosteroids and peptic ulcer: meta-analysis of adverse events during steroid therapy. *J Intern Med* 1994;236: 619-32.
2. Conn HO, Blitzer BL. Nonassociation of adrenocorticosteroid therapy and peptic ulcer. *N Engl J Med* 1976;294: 473-9.
3. Messer J, Reitman D, Sacks HS, et al. Association of adrenocorticosteroid therapy and peptic-ulcer disease. *N Engl J Med* 1983;309: 21-4.
4. Nielsen GL, Sorensen HT, Mellemkjoer L, et al. Risk of hospitalization resulting from upper gastrointestinal bleeding among patients taking corticosteroids: a register-based cohort study. *Am J Med* 2001;111: 541-5.
5. Hernandez-Diaz S, Rodriguez LA. Steroids and risk of upper gastrointestinal complications. *Am J Epidemiol* 2001;153: 1089-93.
6. Piper JM, Ray WA, Daugherty JR, et al. Corticosteroid use and peptic ulcer disease: role of nonsteroidal anti-inflammatory drugs. *Ann Intern Med* 1991;114: 735-40.
7. de Abajo FJ, Gil MJ, Bryant V, et al. Upper gastrointestinal bleeding associated with NSAIDs, other drugs and interactions: a nested case-control study in a new general practice database. *Eur J Clin Pharmacol* 2013;69: 691-701.
8. Corticosteroids: Introduction (Martindale: The Complete Drug Reference). [http://online.lexi.com/lco/action/doc/retrieve/docid/martindale\\_f/1353587](http://online.lexi.com/lco/action/doc/retrieve/docid/martindale_f/1353587) 2010 [cited 2013 Feb 18]; Available from: URL: [http://online.lexi.com/lco/action/doc/retrieve/docid/martindale\\_f/1353587](http://online.lexi.com/lco/action/doc/retrieve/docid/martindale_f/1353587)
9. Saag KG, Furst DE. Major side effects of systemic glucocorticoids. *www UpToDate com* 2012 October 11 [cited 2013 Mar 5]; Available from: URL: [www.uptodate.com](http://www.uptodate.com)
10. Joint Formulary Committee. British National Formulary. Side-effects of corticosteroids. *www medicinescomplete com* 2013 [cited 2013 Aug 14]; Available from: URL: [www.medicinescomplete.com](http://www.medicinescomplete.com)
11. Summary of product characteristics; Dexamethasone Tablets BP 2.0mg. *www mhra gov uk* 2012 November 13 [cited 2013 Aug 14]; Available from: URL: <http://www.mhra.gov.uk/home/groups/spcpil/documents/spcpil/con1369200053458.pdf>
12. Summary of product characteristics; Prednisolone 5mg Tablets. *www mhra gov uk* 2011 July 5 [cited 2013 Aug 14]; Available from: URL: <http://www.mhra.gov.uk/home/groups/spcpil/documents/spcpil/con1364186684018.pdf>
13. Gold Standard, Inc. Prednisone. *Clinical Pharmacology* 2012 September 8 [cited 2013 Oct 11]; Available from: URL: <http://www.clinicalpharmacology.com>
14. Martinek J, Hlavova K, Zavada F, et al. "A surviving myth"--corticosteroids are still considered ulcerogenic by a majority of physicians. *Scand J Gastroenterol* 2010;45: 1156-61.
15. Heidelbaugh JJ, Inadomi JM. Magnitude and economic impact of inappropriate use of stress ulcer prophylaxis in non-ICU hospitalized patients. *Am J Gastroenterol* 2006;101: 2200-5.
16. Zink DA, Pohlman M, Barnes M, et al. Long-term use of acid suppression started inappropriately during hospitalization. *Aliment Pharmacol Ther* 2005;21: 1203-9.
17. Munson JC, Wahl PM, Daniel G, et al. Factors associated with the initiation of proton pump inhibitors in corticosteroid users. *Pharmacoepidemiol Drug Saf* 2012;21: 366-74.



18. van der Goes MC, Jacobs JW, Boers M, et al. Monitoring adverse events of low-dose glucocorticoid therapy: EULAR recommendations for clinical trials and daily practice. *Ann Rheum Dis* 2010;69: 1913-9.
19. Ahsberg K, Ye W, Lu Y, et al. Hospitalisation of and mortality from bleeding peptic ulcer in Sweden: a nationwide time-trend analysis. *Aliment Pharmacol Ther* 2011;33: 578-84.
20. Lanas A, Garcia-Rodriguez LA, Polo-Tomas M, et al. The changing face of hospitalisation due to gastrointestinal bleeding and perforation. *Aliment Pharmacol Ther* 2011;33: 585-91.
21. Juni P, Witschi A, Bloch R, et al. The hazards of scoring the quality of clinical trials for meta-analysis. *JAMA* 1999;282: 1054-60.
22. Alderson P, Roberts I. Corticosteroids for acute traumatic brain injury. *Cochrane Database Syst Rev* 2005; CD000196.
23. Brouwer MC, McIntyre P, de GJ, et al. Corticosteroids for acute bacterial meningitis. *Cochrane Database Syst Rev* 2010; CD004405.
24. Halliday HL, Ehrenkranz RA, Doyle LW. Late (>7 days) postnatal corticosteroids for chronic lung disease in preterm infants. *Cochrane Database Syst Rev* 2009; CD001145.
25. Halliday HL, Ehrenkranz RA, Doyle LW. Early (< 8 days) postnatal corticosteroids for preventing chronic lung disease in preterm infants. *Cochrane Database Syst Rev* 2010; CD001146.
26. Stollman N, Metz DC. Pathophysiology and prophylaxis of stress ulcer in intensive care unit patients. *J Crit Care* 2005;20: 35-45.
27. Cook DJ, Fuller HD, Guyatt GH, et al. Risk factors for gastrointestinal bleeding in critically ill patients. Canadian Critical Care Trials Group. *N Engl J Med* 1994;330: 377-81.

## Corticosteroids and risk of gastrointestinal bleeding: a systematic review and meta-analysis

Sigrid Narum,<sup>1</sup> Tone Westergren,<sup>2</sup> Marianne Klemp<sup>3</sup>

<sup>1</sup>Centre for Psychopharmacology, Diakonhjemmet Hospital, PO Box 85 Vinderen, N-0319 Oslo, Norway and Department of Pharmacology, Oslo University Hospital, Oslo, Norway.

<sup>2</sup>Regional Medicines Information & Pharmacovigilance Centre (RELIS), Department of Pharmacology, Oslo University Hospital, Oslo, Norway.

<sup>3</sup>Norwegian Knowledge Centre for the Health Services, Oslo, Norway and Department of Pharmacology, University of Oslo, Norway.

Correspondence to: S Narum [sigrid.narum@diakonsyk.no](mailto:sigrid.narum@diakonsyk.no), Contact address: Centre for Psychopharmacology, Diakonhjemmet Hospital, PO Box 85 Vinderen, N-0319 Oslo, Norway  
Telephone: +47 22 45 46 45

Key words: gastrointestinal haemorrhage, peptic ulcer perforation, glucocorticoids, pharmacovigilance, [systematic review, meta-analysis](#)

Word count main text: [3435](#) words

## ABSTRACT

**Objective:** To assess whether corticosteroids are associated with increased risk of gastrointestinal bleeding or perforation.

**Design:** Systematic review and meta-analysis of randomised, double-blind, controlled trials comparing a corticosteroid to placebo for any medical condition or in healthy subjects. Studies with steroids given either locally, as single dose or in crossover studies were excluded.

**Data sources:** Literature search using Medline, Embase and Cochrane Database of Systematic Reviews between 1983 and 22<sup>th</sup> May 2013.

**Outcome measure:** Outcome measures were the occurrence of gastrointestinal bleeding or perforation. Predefined subgroup analyses were done for disease severity, use of NSAIDs or gastroprotective drugs, and history of peptic ulcer.

**Results:** 159 studies (N= 33 253) were included. In total, 804 (2.4%) patients had a gastrointestinal bleeding or perforation (2.9% and 2.0% for corticosteroids and placebo). Corticosteroids increased the risk of gastrointestinal bleeding or perforation by 40% (OR 1.43, 95% CI 1.22 to 1.66). The risk was increased for hospitalized patients (OR 1.42, 95% CI 1.22 to 1.66). For patients in ambulatory care, the increased risk was not statistically significant (OR 1.63, 95% CI 0.42 to 6.34). Only 11 gastrointestinal bleeds or perforations occurred among 8 651 patients in ambulatory care (0.13%).

Increased risk was still present in subgroup analyses (studies with NSAID use excluded; OR 1.44, 95% CI 1.20 to 1.71, peptic ulcer as exclusion criterion excluded; OR 1.47, 95% CI 1.21 to 1.78, and use of gastroprotective drugs excluded; OR 1.42, 95% CI 1.21 to 1.67).

**Conclusion:** Corticosteroid use was associated with increased risk of gastrointestinal bleeding and perforation. The increased risk was statistically significant for hospitalized patients only. For patients in ambulatory care, the total occurrence of bleeding or perforation was very low, and the increased risk was not statistically significant.

## ARTICLE SUMMARY

### Article focus

- The present systematic review aims to explore if systemic corticosteroids are associated with increased risk of gastrointestinal bleeding or perforation.

### Key messages

2

- The current [systematic review](#) indicates that disease severity might influence the risk of gastrointestinal bleeding or perforation by corticosteroid use.
- [Statistically significant](#) increased risk of gastrointestinal bleeding or perforation was limited to hospitalized patients. Patients in ambulatory care had [a very low occurrence of gastrointestinal bleeding or perforation and the increased risk was not statistically significant](#).
- **Strengths and limitations of this study**
- The strength of this systematic review is the size due to inclusion of a large number of randomized controlled trials that allowed for subgroup analyses.
- Limitations are the possible loss of relevant studies due to the selected search strategy, the quality of adverse event reporting in the primary studies and the heterogeneity in the patient [populations](#).

## INTRODUCTION

The association between corticosteroid use and gastrointestinal adverse effects, including bleeding or perforation, has been a source of debate since the 1950s.<sup>1-3</sup> Since gastrointestinal bleeding and perforation are rare events, no single randomised controlled trial have been large enough to show any increased risk [for GI bleeding](#) with the use of corticosteroids.

[Adverse effects and studies of rare events can often be effectively investigated in observational studies, thus controlled, observational studies may be the study of choice to detect rare adverse effects. For corticosteroid use, several](#) observational studies have been performed to clarify whether corticosteroids do induce gastrointestinal bleeding [or not](#), but there is still uncertainty whether this adverse effect is a result of corticosteroid use, [use of](#) other medications, underlying disease or other causes.<sup>4-7</sup>

[This lack of evidence is reflected in the literature.](#) In databases and in product monographs for corticosteroids, peptic ulcer disease and gastrointestinal bleeding may or may not be described as possible adverse effects.<sup>8-13</sup> [Similarly, in clinical recommendations an association between corticosteroid use and peptic ulcer has been described as unlikely and the value of anti-ulcer prophylaxis has been questioned due to a low bleeding risk.](#)<sup>8-13</sup> Though many gastroenterologists consider corticosteroids as not having ulcerogenic properties, a recent survey has shown that corticosteroids are still considered ulcerogenic by a majority of physicians and that a majority of practitioners would treat corticosteroid users with ulcer

1  
2  
3 prophylaxis.<sup>14</sup> This uncertainty may have consequences for clinical recommendations and  
4 treatment guidelines, and is the main reason why we performed this systematic review.<sup>15-18</sup>  
5  
6

7  
8 Gastrointestinal bleeding, bleeding peptic ulcer and perforation are feared complications of  
9 peptic ulcer disease, associated with considerable morbidity and mortality.<sup>19-20</sup> NSAID use  
10 and *Helicobacter pylori* infection are the most important risk factors for peptic ulcer disease.  
11 Bleeding or perforation is also seen as complications to stress ulcers among patients with  
12 critical illness in intensive care units. Gastrointestinal bleeding and perforation are assumed  
13 to occur when ulcers erode into underlying vessels. The mechanism by which corticosteroids  
14 might induce gastrointestinal bleeding or perforation has not been fully established, but  
15 corticosteroids may impair tissue repair, thus leading to delayed wound healing.<sup>8</sup> In addition,  
16 the anti-inflammatory and analgesic properties of corticosteroids may mask symptoms of  
17 gastroduodenal ulcers and ulcer complications and thus possibly delay diagnosis.  
18  
19  
20  
21  
22  
23  
24

25  
26 The aim of this systematic review was to examine whether use of systemic corticosteroids  
27 was associated with an increased risk of peptic ulcer complications such as gastrointestinal  
28 bleeding or perforation. Since observational studies have not been conclusive, we have  
29 chosen to include published studies with a randomized, controlled design.  
30  
31  
32  
33

## 34 **METHODS**

### 35 **Search strategy and selection criteria**

36  
37 A systematic literature search was performed to identify randomized, double-blind, placebo  
38 controlled trials in which any systemic corticosteroid (defined as oral, intravenous, or  
39 intramuscular) or a placebo had been administered to randomly selected groups of patients in  
40 the treatment of a medical disorder or to healthy subjects.  
41  
42

43  
44 We searched the databases MEDLINE and EMBASE with no language restrictions between  
45 1983 (since date of the latest review by Conn et al.)<sup>1</sup> and 30th June 2011 using the following  
46 text words: (betamethasone/ or dexamethasone/ or methylprednisolone/ or prednisolone/ or  
47 prednisone/ or triamcinolone/ or cortisone/ or hydrocortisone/) limited to randomized  
48 controlled trial, 1983 to 20110630, humans, double-blind.mp and placebo.mp. An updated  
49 search was performed 22<sup>nd</sup> May 2013. For the full search strategy, see supplementary file 1.  
50  
51 An additional search was performed in the Cochrane Database of Systematic Reviews for  
52 corticosteroids and the following text words: Traumatic injury, sepsis/septic shock,  
53 meningitis, bronchopulmonary dysplasia, liver diseases, lung diseases and rheumatoid  
54  
55  
56  
57  
58  
59  
60

1  
2  
3 arthritis. Only results fully reported in journal articles in English, German, or any  
4 Scandinavian language were considered for inclusion. Whenever a title or abstract suggested  
5 that a randomized, double-blind, placebo controlled trial comparing a corticosteroid to  
6 placebo **had been** performed, the full text version was reviewed for documentation of  
7  
8 gastrointestinal adverse events. Articles with documentation of gastrointestinal adverse  
9 effects or with assessment of adverse event monitoring described in the methods section were  
10 included. Titles, abstracts, and full-text articles were evaluated and reviewed for inclusion by  
11 at least two of the authors. Disagreements were resolved by consensus among the reviewers.  
12  
13  
14  
15  
16

17  
18 Methodological quality assessment of eligible trials was done by including only randomized,  
19 double-blind studies.<sup>21</sup> In most studies, there was no specific description of randomisation  
20 and allocation concealment, blinding methods, or handling of withdrawals. Authors'  
21 description of randomization and double-blinding was assumed to be valid. We used  
22 intention-to-treat data when available. All types of co-medications were allowed if  
23 administered systematically to both groups or as a part of standard care. No medical disorder  
24 or age groups were excluded. When medications known to induce gastrointestinal symptoms,  
25 such as non-steroidal anti-inflammatory drugs (NSAIDs) or acetylsalicylic acid (ASA) had  
26 been used, these medications were analysed as co-variables. We excluded trials with  
27 crossover design because of potential difficulties in assessment between the treatment groups.  
28 Trials in which the steroid was given as a single dose were also excluded due to generally  
29 short follow up.  
30  
31  
32  
33  
34  
35  
36  
37  
38

### 39 **Data extraction and outcomes reporting**

40 For the diagnosis of complications of gastroduodenal ulcers, such as occult or visible blood in  
41 stool, gastrointestinal bleeding, haematemesis, melena, and gastrointestinal perforation, the  
42 investigators' diagnoses were accepted as valid without requiring specific criteria or methods.  
43 Outcomes like dyspepsia, gastritis, duodenitis, and epigastric pain were not included, nor  
44 were necrotizing enterocolitis. For assessment of gastrointestinal bleeding or perforation as  
45 an adverse effect, the number of events should be reported in the results section as text or in a  
46 table. Events reported as percentages only, were calculated into numbers by us. **In some**  
47 **trials,** other adverse effects were reported in the results section but no gastrointestinal  
48 bleeding **was** listed. These studies were included only if adverse event monitoring was  
49 described in the methods section **or** if it was judged reasonable to expect from the adverse  
50 event monitoring system that any gastrointestinal adverse effects would have been recorded.  
51  
52  
53  
54  
55  
56  
57  
58  
59  
60

1  
2  
3 We recorded information on study characteristics and demographics such as publication year,  
4 corticosteroid use, indication for treatment, use of concomitant medications, description of  
5 adverse effect, study size, duration of treatment and follow up. Severity of disease was  
6 assessed, by assuming that patients needing hospitalisation were sicker than patients in  
7 ambulatory care. Information regarding exclusion from study by ongoing, recent or a history  
8 of peptic ulcer disease were also recorded. Risk of bias was assessed by recording which  
9 methods that were used for monitoring, definition and description of adverse effects,  
10 randomization, and selection criteria.

### 17 **Statistical analysis**

18 The relative frequencies of the adverse effects were compared in the placebo and the  
19 corticosteroid group(s) using conventional statistics and meta-analysis. Subgroup analyses  
20 were performed for different predefined variables, such as for concomitant NSAIDs use, for  
21 use of gastroprotective drugs (proton pump inhibitors, H2 blockers, or antacids), and for  
22 disease severity.

23 All meta-analytic calculations were made with RevMan (version 5.2) using the Mantel-  
24 Haenszel method with random effects model. For other statistics, SPSS (version 20) was  
25 used. For binary outcomes, we calculated odds ratios (OR) and 95 % confidence intervals.  
26 All analyses were two-tailed, with  $\alpha$  of 0.05.

## 35 **RESULTS**

### 36 **Literature search and study selection**

37 The search process identified 3483 records from database searches and fifteen studies were  
38 retrieved by hand searching. A total of 159 articles fitted our inclusion criteria and were  
39 included in the review. Further details regarding study inclusion and exclusion are shown in  
40 figure 1. We performed an updated search 22<sup>nd</sup> May 2013 and retrieved 3 additional studies  
41 reporting confirmed gastrointestinal bleeding events. The new studies did not change the  
42 results.

### 48 **Characteristics of included studies**

49 In this systematic review 159 studies were included. The main medical conditions were  
50 severe infections, lung diseases, traumatic injuries, and prevention of bronchopulmonary  
51 dysplasia in premature infants. Further details regarding the disease groups are shown in table  
52 1.

53  
54  
55  
56  
57  
58  
59  
60



Table 1: Medical conditions in which corticosteroids were tested, with number of studies, number of participants, and number of adverse effects. Grouping by treatment level was based on statements in the reports and, if there was no indication of treatment level, on clinical judgement. Patients with traumatic injury, meningitis, sepsis/septic shock, and bronchopulmonary dysplasia were defined as hospitalized.

| Disease                                         | Hospitalized      |                        |       |                           |      | Ambulant          |                        |      |                           |      | Total                  |
|-------------------------------------------------|-------------------|------------------------|-------|---------------------------|------|-------------------|------------------------|------|---------------------------|------|------------------------|
|                                                 | Number Of studies | Number of participants |       | Number of adverse effects |      | Number of studies | Number of participants |      | Number of Adverse effects |      | Number of participants |
|                                                 |                   | Ster                   | Plac  | Ster                      | Plac |                   | Ster                   | Plac | Ster                      | Plac |                        |
| Traumatic injury (brain, spinal cord, multiple) | 9                 | 5821                   | 5790  | 95                        | 75   | 0                 | -                      | -    | -                         | -    | 11611                  |
| Meningitis                                      | 18                | 1589                   | 1549  | 110                       | 91   | 0                 | -                      | -    | -                         | -    | 3138                   |
| Sepsis / septic shock                           | 7                 | 482                    | 449   | 32                        | 28   | 0                 | -                      | -    | -                         | -    | 931                    |
| Bronchopulmonary dysplasia                      | 21                | 1508                   | 1487  | 155                       | 85   | 0                 | -                      | -    | -                         | -    | 2995                   |
| Liver diseases *                                | 4                 | 150                    | 114   | 26                        | 15   | 3                 | 705                    | 709  | 5                         | 1    | 1678                   |
| Lung diseases %                                 | 20                | 1149                   | 1105  | 8                         | 3    | 7                 | 537                    | 544  | 0                         | 0    | 3335                   |
| Rheumatoid arthritis                            | 0                 | -                      | -     | -                         | -    | 5                 | 283                    | 279  | 1                         | 2    | 562                    |
| Miscellaneous #                                 | 24                | 1743                   | 1666  | 46                        | 24   | 41                | 2806                   | 2788 | 2                         | 0    | 9003                   |
| Sum                                             | 103               | 12442                  | 12160 | 472                       | 321  | 56                | 4331                   | 4320 | 8                         | 3    | 33253                  |

Ster = corticosteroids, Plac= placebo. \* Hepatitis, liver cirrhosis, acute hepatic failure. % Asthma, ARDS, bronchiolitis, chronic obstructive pulmonary disease, pneumonia, tuberculosis, ventilator weaning. # Miscellaneous diseases as stated in the original reports (number of studies in brackets): Acute otitis media, adhesive capsulitis, allergic rhinitis, Alzheimer's disease, Bechets syndrome, Bell's palsy (2), carpal tunnel syndrome, cerebral infarction, chronic fatigue syndrome, coronary artery bypass grafting (2), cysticercus granuloma with seizures, depression, Duchenne's muscular dystrophy, emesis (9), erysipelas, facial nerve paralysis (2), glaucoma, Grave's orbitopathy, Guillain-Barré syndrome (2), healthy postmenopausal women, Hensch Schonlein purpura (2), herpes zoster (3), IgA nephropathy, intracerebral hemorrhage (2), leprosy, lumbar disc surgery, migraine headaches, multiple sclerosis (3), myocardial infarction (2), post-infectious irritable bowel syndrome, preeclampsia, (pre)terminal cancer (2), aphthous stomatitis, sinonasal polyposis, sinusitis, Sjögren's syndrome, Sydenham's Chorea children, tetanus, tonsillectomy (2), tuberculous pericarditis in HIV, typhoid fever, urticaria, vestibular neuritis, withdrawal headache.

The corticosteroids used were dexamethasone (55), prednisolone (30), methylprednisolone (29), prednisone (22), hydrocortisone (16), and other steroids or combinations (7). The sample size ranged from 15 to 10 008 people, with a median sample size of 86. The median duration of treatment was 8.5 days (range 1 to 1095 days), and the median follow-up period was 56 days (range 1 to 1155 days). There was a trend towards shorter duration of treatment and follow up during hospital treatment (6.0 and 33 days) compared to ambulant treatment (14 and 58 days) (p=0.061 and p=0.057, respectively). The adverse effects were described as any form of bleeding in 59 studies (upper /lower, minor, haematemesis, melena, visible/occult blood in stool), perforation in 7 studies (perforated gastric ulcer, ileum perforation), and both bleeding and perforation in 6 studies. The definition of gastrointestinal



1  
2  
3 bleeding varied between the studies, from bleeding requiring transfusion to occult blood in  
4 stool (bronchopulmonary dysplasia).

5  
6 Altogether, 72 (45.3%) studies reported gastrointestinal bleeding or perforation as an adverse  
7 effect (67 hospitalized, 5 ambulant). In the 87 studies without reporting of any  
8 gastrointestinal bleeding or perforation, peptic ulcer was described in only four studies.  
9

10  
11  
12 Use of concomitant medication was described in 135 studies (84.9%). In addition, use of  
13 concomitant medication was likely in many of the remaining 24 studies, as a consequence of  
14 diagnoses such as ARDS, bronchopulmonary dysplasia, and traumatic injury to head or spine.  
15 Use of medication for any pre-existing diseases was sparsely described. Concomitant use of  
16 NSAIDs /ASA was described in 19 studies (bronchopulmonary dysplasia, rheumatoid  
17 arthritis, miscellaneous and sepsis in 9, 5, 4, and 1 study, respectively), and use of  
18 gastroprotective drugs was described in 14 studies. In addition, use of concomitant drugs  
19 “according to standard clinical practice” etc., which may potentially include use of  
20 gastroprotective drugs, was described in 12 studies.  
21  
22  
23  
24  
25  
26  
27  
28

29  
30 Peptic ulcer; ongoing, recent or previous, was an exclusion criteria in 53 (33.3%) of the  
31 studies. In the majority of studies (85, 53.5%), the authors reported no effect of  
32 corticosteroids on the primary efficacy endpoint. Study specific characteristics are shown in  
33 table 2 and supplementary file 2.  
34  
35  
36  
37  
38  
39  
40  
41  
42  
43  
44  
45  
46  
47  
48  
49  
50  
51  
52  
53  
54  
55  
56  
57  
58  
59  
60

Table 2: Study specific characteristics

| Summary of study characteristics    | Studies total     | Studies with bleeding | Studies without bleeding | p-values  |
|-------------------------------------|-------------------|-----------------------|--------------------------|-----------|
| Studies included (%)                | 159               | 72 (45.3)             | 87 (54.7)                |           |
| Year of publication, median         |                   | 1998                  | 1999                     | (p=0.109) |
| Description of adverse effect (%)   |                   |                       |                          |           |
| Bleeding                            |                   | 59 (81.9)             | 0                        |           |
| Perforation                         |                   | 7 (9.7)               | 0                        |           |
| Bleeding and perforation            |                   | 6 (8.3)               | 0                        |           |
| Peptic ulcer only                   |                   |                       | 4                        |           |
| Level of care (%)                   |                   |                       |                          |           |
| Hospitalized                        | 103               | 67 (93.1)             | 36 (41.4)                | (p<0.001) |
| Ambulant                            | 56                | 5 (6.9)               | 51 (58.6)                |           |
| Use of concomitant medication (%)   |                   |                       |                          |           |
| No concomitant medication described | 24                | 11 (15.3)             | 13 (14.9)                |           |
| Concomitant medication described    | 135               | 61 (84.7)             | 74 (85.1)                |           |
| - NSAIDs / ASA                      | 19                | 11 (15.3)             | 8 (9.2)                  | (p=0.326) |
| - Gastroprotective drugs            | 14                | 12                    | 2                        | (p=0.002) |
| Exclusion criteria (%)              |                   |                       |                          |           |
| Recent / ongoing peptic ulcer       | 36                | 14 (19.4)             | 22 (25.3)                | (p=0.237) |
| Previous / history of peptic ulcer  | 17                | 6 (8.3)               | 11 (12.6)                |           |
| Study size, number of participants  |                   |                       |                          |           |
| Median (IQR)                        | 86 (49.0 - 181.0) | 100 (60.3 - 246.5)    | 70 (40.0 - 128.0)        | (p=0.104) |
| Duration of treatment, days         |                   |                       |                          |           |
| Median (IQR)                        | 8.5 (3.3 - 28.0)  | 6.0 (3.0 - 12.0)      | 14 (4.0 - 45.0)          | (p=0.061) |
| Duration of follow up, days         |                   |                       |                          |           |
| Median (IQR)                        | 56 (21.0 - 243.8) | 33 (21.0 - 180.0)     | 58 (19.5 - 286.5)        | (p=0.057) |

NSAIDs= nonsteroidal antiinflammatory drugs, ASA= acetylsalicylic acid, PPIs= proton pump inhibitors, IQR= interquartile range

### Risk of gastrointestinal bleeding or perforation

The analysis included 33 253 participants (16 773 received corticosteroids and 16 480 received placebo). Of those, 804 patients (480 receiving a corticosteroid and 324 receiving a placebo) were reported to have a gastrointestinal bleeding or perforation, which comprises 2.4 % of the study participants (2.9% and 2.0% for corticosteroids and placebo, respectively). Overall, meta-analysis of all the included studies showed a **40%** increased odds ratio of experiencing gastrointestinal bleeding or perforation among corticosteroid users compared to placebo users (odds ratio **1.43**, 95% confidence interval **1.22** to **1.66**) (figure 2, and supplementary file **3**). Subgroup analysis for each disease group showed a trend towards an increased risk of gastrointestinal bleeding or perforation in seven out of eight subgroups, but the result was statistically significant only for premature infants in prevention of bronchopulmonary dysplasia (**1.83**, **1.37** to **2.43**).

### Sensitivity analyses

Data from **subgroup** analyses are shown in table 3.

Table 3: Summary of subgroup analyses

|                                                    | Number of studies | Number of patients | Odds ratio (95 % CI) | Events steroids/ placebo | Events per 1000 patients steroids / placebo |
|----------------------------------------------------|-------------------|--------------------|----------------------|--------------------------|---------------------------------------------|
| Hospitalized                                       | 103               | 24 602             | 1.42 (1.22 - 1.66)   | 472 / 321                | 37.9 / 26.4                                 |
| Ambulant                                           | 56                | 8 651              | 1.63 (0.42 - 6.34)   | 8 / 3                    | 1.8 / 0.7                                   |
| NSAID use not documented                           | 140               | 30 874             | 1.44 (1.20 - 1.71)   | 372 / 248                | 23.9 / 16.2                                 |
| NSAID use documented                               | 19                | 2 379              | 1.30 (0.81 - 2.07)   | 108 / 76                 | 90.2 / 64.4                                 |
| Peptic ulcer as exclusion criterion not documented | 106               | 25 760             | 1.47 (1.21 - 1.78)   | 421 / 284                | 32.5 / 22.1                                 |
| Peptic ulcer as exclusion criterion documented     | 53                | 7 493              | 1.26 (0.81 - 1.96)   | 59 / 40                  | 15.4 / 10.9                                 |
| Gastroprotective drugs not documented              | 145               | 31 759             | 1.42 (1.21 - 1.67)   | 442 / 299                | 27.6 / 19.0                                 |
| Gastroprotective drugs documented                  | 14                | 1 494              | 1.29 (0.62 - 2.69)   | 38 / 25                  | 50.6 / 33.6                                 |
| Bronchopulmonary dysplasia excluded                | 138               | 30 258             | 1.29 (1.07 - 1.55)   | 325 / 239                | 21.3 / 15.9                                 |

1  
2  
3  
4  
5  
6  
7  
8  
9  
10  
11  
12  
13  
14  
15  
16  
17  
18  
19  
20  
21  
22  
23  
24  
25  
26  
27  
28  
29  
30  
31  
32  
33  
34  
35  
36  
37  
38  
39  
40  
41  
42  
43  
44  
45  
46  
47  
48  
49  
50  
51  
52  
53  
54  
55  
56  
57  
58  
59  
60

Subgroup analysis of studies with hospitalized patients showed an increased risk of developing gastrointestinal bleeding or perforation (odds ratio 1.42, 95% confidence interval 1.22 to 1.66). There was also a trend towards increased risk for patients in ambulatory care (1.63, 0.42 to 6.34), but this result was not significant. When the studies with documentation of concomitant NSAID use were excluded, a significant difference between corticosteroid and placebo with respect to gastrointestinal bleeding or perforation was still present (1.44, 1.20 to 1.71). When all studies of premature infants in prevention of bronchopulmonary dysplasia were excluded from the analysis (assuming NSAIDs were given in all studies), the results were lower, but still significant (1.29, 1.07 to 1.55). When studies with peptic ulcer as exclusion criterion and studies with concomitant use of gastroprotective drugs were subsequently excluded from the analyses, there were little change in the risk of bleeding or perforation in the remaining studies (table 3). The majority of the adverse effects occurred in hospitalized patients. Only 11 gastrointestinal bleedings or perforations occurred among 8 651 patients in ambulatory care (0.13%), compared to 793 gastrointestinal bleeds or perforations among 24 602 hospitalized patients (3.22%) (p<0.001)(table 1). The absolute risk of experiencing GI-bleeding, events per 1000 patients were 1.8 for ambulant patients given steroids, compared to 0.7 for ambulant patients given placebo (table 3). In contrast, hospitalized patients had a much higher risk, 37.9/1000 for steroids and 26.4/1000 for placebo.

## DISCUSSION

The overall findings of this systematic review show that use of corticosteroids may increase the odds ratio by 40% for gastrointestinal bleeding or perforation. The increased risk, however, was limited to hospitalized patients. For patients in ambulatory care, who had a very low absolute occurrence of gastrointestinal bleeding or perforation, the increased risk was not statistically significant. The results persisted when high/low risk patients (concomitant NSAID use, previous peptic ulcer as exclusion criterion, and use of gastroprotective drugs) were excluded, indicating the robustness of the results.

### Comparison with other studies

Previously published meta-analyses addressing whether corticosteroid use predispose for gastrointestinal bleeding or perforation have shown conflicting results.<sup>1-3</sup> In two meta-analyses, Conn et al. concluded that there was no increased risk of peptic ulcer,

1  
2  
3 gastrointestinal bleeding or perforation by corticosteroid use.<sup>1 2</sup> In contrast, Messer et al.  
4 found an increased incidence of both peptic ulcer and gastrointestinal bleeding.<sup>3</sup> In a  
5 subgroup analysis by Conn,<sup>2</sup> however, there was a significantly higher rate of gastrointestinal  
6 bleeding from an unknown site among corticosteroid users compared to controls. In his  
7 second paper, steroid users had more gastrointestinal adverse effects (ulcers, symptoms of  
8 ulcers, bleeding, erosions and perforation) than the controls, but because of subgroup  
9 analyses only and no pooling of results, no differences emerged as statistically significant.<sup>1</sup>  
10  
11 These meta-analyses of randomized controlled trials, which included published literature up  
12 to 1983, show how different inclusion criteria, selection criteria, data handling and  
13 interpretation of results may give totally different results and conclusions. Newer Cochrane  
14 meta-analyses have addressed the question in selective patient populations (meningitis,  
15 traumatic brain injury, and preterm infants). These analyses show a trend<sup>22-24</sup> or a statistically  
16 significant increase<sup>25</sup> in risk ratio of experiencing gastrointestinal bleeding, with the included  
17 studies and results similar to the subgroups in our study.  
18  
19

20  
21 In our study we included the literature published from 1983 up to date. With 33 253  
22 participants from double-blind, randomized, controlled trials, this is the largest meta-analysis  
23 analysing whether corticosteroids increase the risk of gastrointestinal bleeding. Due to the  
24 large size of our study, findings that were seen as trends in other reviews or went unnoticed  
25 because of many subgroup analyses have emerged as a significant increase in risk, despite  
26 non-significant occurrence in all subgroups except prevention of bronchopulmonary  
27 dysplasia in premature infants. Surprisingly, peptic ulcers were hardly listed as an adverse  
28 effect in the included studies, in contrast to the studies in the previous reviews by Conn and  
29 Messer. One explanation may be the differences in disease panorama and the discovery and  
30 treatment of *Helicobacter Pylori*. The true occurrence of peptic ulcer may also have been  
31 underestimated in the studies because of heavy medication and intensive care treatment.  
32  
33  
34  
35  
36  
37  
38  
39  
40  
41  
42  
43  
44  
45

#### 46 **Strengths and limitations of this review**

47  
48 In many reviews, use of narrow inclusion criteria and wide exclusion criteria make the  
49 population homogeneous, but with rare events there is a high risk of insignificant results. In  
50 our analysis, inclusion of all studies with a relevant design, including those with concomitant  
51 medications and studies with zero events may reflect more realistic treatment conditions and  
52 may contribute to the validity of the findings. Due to the large size of included studies in our  
53 review we were able to perform predefined subgroup analyses assessing severity of disease  
54 (ie assessed as hospitalized or as ambulant treatment), use of NSAIDs or gastroprotective  
55  
56  
57  
58  
59  
60

1  
2  
3 drugs, and documentation of peptic ulcer as exclusion criterion. To our knowledge, this is the  
4 first systematic review to indicate that disease severity might influence the risk of  
5 gastrointestinal bleeding or perforation in corticosteroid users.  
6  
7

8  
9 The main limitations of this review are the possible loss of relevant studies due to the selected  
10 search strategy, the quality of the included trials, and the heterogeneity of the included patient  
11 populations. However, we believe the findings to be robust, despite this, due to the large  
12 number of included studies and participants. Randomized controlled trials are designed to  
13 show effect of treatment, not to detect adverse effects, which in many studies were sparsely  
14 reported or not reported at all. However, since we included only double-blind studies with  
15 placebo control, we suspect similar under-reporting in both study groups. To minimize risk of  
16 bias according to adverse effect detection and reporting, we recorded the methods used for  
17 monitoring adverse effects and how the adverse effect was defined. We found diversity in the  
18 definitions of gastrointestinal bleeding (i.e. from occult blood in stool to gastrointestinal  
19 bleeding requiring transfusion or hospital stay). In addition, differences in methods used for  
20 monitoring adverse effects may explain the risk differences found in the sensitivity analyses.  
21 More rigorous follow up of patients in intensive care units may thus explain some of the risk  
22 differences found between hospitalized patients and patients in ambulatory care. This makes  
23 comparisons of absolute risk differences between different disease groups difficult.  
24  
25  
26  
27  
28  
29  
30  
31  
32  
33  
34  
35

36 We aimed to include all disease groups, but still some groups may be under-represented (i.e  
37 rheumatoid arthritis, organ transplanted patients) since corticosteroid use is standard  
38 treatment and no longer compared to placebo in randomized controlled trials. Patients  
39 included in randomized controlled trials may differ from patients excluded from trial  
40 participation, and may be healthier, without previous peptic ulcer. This may underestimate  
41 the true effect of corticosteroids on gastrointestinal bleeding and perforation within the  
42 population. In the majority of the included studies, use of concomitant medications was  
43 described. Concomitant medication was related to the study indication (e.g. treatment of  
44 trauma, meningitis, sepsis, BPD etc.), in contrast to medications for co-existing diseases,  
45 which were hardly mentioned. Concomitant use of gastroprotective drugs and descriptions of  
46 supportive care according to standard clinical practice, which may include use of  
47 gastroprotective drugs, was declared only in a minority of the studies. In addition, potential  
48 under-reporting and undisclosed use of gastroprotective drugs may have underestimated the  
49 true risk of having GI-bleeding with steroid use. Undisclosed use of gastroprotective drugs  
50  
51  
52  
53  
54  
55  
56  
57  
58  
59  
60

1  
2  
3 may especially apply to ambulant treated patients with dyspepsia. Because of short term  
4 treatment and inclusion of only double-blind studies we assume that the effect of possible  
5 under-reporting and undisclosed use of gastroprotective drugs was not substantial. Despite  
6 the heterogeneity of the included studies and a potential of under-reporting of adverse effects,  
7 there is a consistency across the analyses of an increased frequency of gastrointestinal  
8 bleeding and perforation among patients given steroids compared to patients given placebo.  
9 This indicates robustness of the analysis.  
10  
11  
12  
13  
14  
15  
16  
17

### 18 **Clinical implications of this review**

19 Our analysis show that the increased risk of gastrointestinal bleeding or perforation applied to  
20 hospitalized patients only, indicating that additional factors to corticosteroid therapy, such as  
21 disease severity or advanced medical treatment may make some patients more vulnerable to  
22 adverse events to corticosteroid use. One possible explanation is that the bleedings and  
23 perforations seen among hospitalized patients may be complications to the stress ulcers seen  
24 in critically ill patients.  
25  
26  
27  
28

29 Due to diagnoses or illnesses like traumatic injury, meningitis, and sepsis we suspected a  
30 substantial portion of the hospitalized patients to have been critically ill. To scrutinize this  
31 further we aimed to do separate analyses of critically ill patients or treatment in intensive care  
32 units, but lack of descriptions of critical illness or treatment in intensive care units in the  
33 included studies made us use hospitalization and ambulant treatment as surrogate markers for  
34 disease severity.  
35  
36  
37  
38

39 Stress ulcers occur in response to severe physiologic stress in critically ill patients. Although  
40 the mechanism is not completely understood, it involves decreased mucosal blood flow and  
41 subsequent tissue ischemia, resulting in breakdown of mucosal defences, allowing  
42 physiological factors to produce injury and ulceration.<sup>26</sup> Many risk factors for stress ulcer  
43 bleeding have been proposed,<sup>26 27</sup> but only mechanical ventilation and coagulopathy have  
44 been documented as independent risk factors. Despite this evidence, several studies have  
45 shown that acid-suppressive therapy is used as stress ulcer prophylaxis in both hospital wards  
46 and outpatient settings.<sup>15-17</sup> This has been described as an inappropriate use of acid-  
47 suppressive therapy. An explanation to this overuse may be the discrepancy between product  
48 monographs and databases/clinical recommendations in assessment of peptic ulcer disease  
49 and gastrointestinal bleeding as possible adverse effects to corticosteroids.<sup>8 11-13</sup>  
50  
51  
52  
53  
54  
55  
56  
57  
58  
59  
60



1  
2  
3 Our analysis also showed increased risk of gastrointestinal bleeding or perforation among  
4 patients in ambulatory care, but the result was not significant due to a very low occurrence of  
5 gastrointestinal bleeding and perforation. According to our results, there is insufficient data to  
6 conclude whether corticosteroids are associated with gastrointestinal bleeding or perforation  
7 among patients in ambulatory care. It seems reasonable to conclude that the absolute risk of  
8 gastrointestinal bleeding is very low in the ambulatory setting.  
9  
10  
11  
12

13  
14  
15  
16  
17  
18 Contributors: SN, TW and MK conceived the study, performed the systematic review, data extraction,  
19 analysed the data, and drafted the manuscript. All authors had full access to the data and take  
20 responsibility for the integrity of the data and accuracy of the analysis. SN is guarantor.

21  
22 Funding: None.

23  
24 Competing interests: All authors have completed the ICMJE uniform disclosure form at  
25 [www.icmje.org/coi\\_disclosure.pdf](http://www.icmje.org/coi_disclosure.pdf) and declare: no support from any organisation for the submitted  
26 work; no financial relationships with any organisations that might have an interest in the submitted  
27 work in the previous three years; no other relationships or activities that could appear to have  
28 influenced the submitted work.

29  
30 Ethical approval: Not required.  
31  
32

33  
34  
35 Figure texts and titles

36  
37 Figure 1: Flowchart for the selection of eligible studies

38  
39 Figure 2: Summary of pooled results.

40 Gastrointestinal bleeding in corticosteroid users versus placebo users.

41 The Mantel-Haenszel (M-H) method with random effects model was used.

42  
43  
44 Supplementary file 1: Search strategy - Medline

45  
46 Supplementary file 2: Study characteristics

47  
48  
49 Supplementary file 3: Forest plot of all trials.

50 Gastrointestinal bleeding in corticosteroid users versus placebo users.

51 The Mantel-Haenszel (M-H) method with random effects model was used.  
52  
53  
54  
55  
56  
57

58 **REFERENCES**



- 1
  - 2
  - 3
  - 4
  - 5
  - 6
  - 7
  - 8
  - 9
  - 10
  - 11
  - 12
  - 13
  - 14
  - 15
  - 16
  - 17
  - 18
  - 19
  - 20
  - 21
  - 22
  - 23
  - 24
  - 25
  - 26
  - 27
  - 28
  - 29
  - 30
  - 31
  - 32
  - 33
  - 34
  - 35
  - 36
  - 37
  - 38
  - 39
  - 40
  - 41
  - 42
  - 43
  - 44
  - 45
  - 46
  - 47
  - 48
  - 49
  - 50
  - 51
  - 52
  - 53
  - 54
  - 55
  - 56
  - 57
  - 58
  - 59
  - 60
1. Conn HO, Poynard T. Corticosteroids and peptic ulcer: meta-analysis of adverse events during steroid therapy. *J Intern Med* 1994;236: 619-32.
  2. Conn HO, Blitzer BL. Nonassociation of adrenocorticosteroid therapy and peptic ulcer. *N Engl J Med* 1976;294: 473-9.
  3. Messer J, Reitman D, Sacks HS, Smith H, Jr., Chalmers TC. Association of adrenocorticosteroid therapy and peptic-ulcer disease. *N Engl J Med* 1983;309: 21-4.
  4. Nielsen GL, Sorensen HT, Mellekjoer L, Blot WJ, McLaughlin JK, Tage-Jensen U, et al. Risk of hospitalization resulting from upper gastrointestinal bleeding among patients taking corticosteroids: a register-based cohort study. *Am J Med* 2001;111: 541-5.
  5. Hernandez-Diaz S, Rodriguez LA. Steroids and risk of upper gastrointestinal complications. *Am J Epidemiol* 2001;153: 1089-93.
  6. Piper JM, Ray WA, Daugherty JR, Griffin MR. Corticosteroid use and peptic ulcer disease: role of nonsteroidal anti-inflammatory drugs. *Ann Intern Med* 1991;114: 735-40.
  7. de Abajo FJ, Gil MJ, Bryant V, Timoner J, Oliva B, Garcia-Rodriguez LA. Upper gastrointestinal bleeding associated with NSAIDs, other drugs and interactions: a nested case-control study in a new general practice database. *Eur J Clin Pharmacol* 2013;69: 691-701.
  8. Corticosteroids: Introduction (Martindale: The Complete Drug Reference). [http://online.lexi.com/lco/action/doc/retrieve/docid/martindale\\_f/1353587](http://online.lexi.com/lco/action/doc/retrieve/docid/martindale_f/1353587) 2010 [cited 2013 Feb 18]; Available from: URL: [http://online.lexi.com/lco/action/doc/retrieve/docid/martindale\\_f/1353587](http://online.lexi.com/lco/action/doc/retrieve/docid/martindale_f/1353587)
  9. Saag KG, Furst DE. Major side effects of systemic glucocorticoids. *www UpToDate.com* 2012 October 11 [cited 2013 Mar 5]; Available from: URL: [www.uptodate.com](http://www.uptodate.com)
  10. Joint Formulary Committee. British National Formulary. Side-effects of corticosteroids. *www medicinescomplete.com* 2013 [cited 2013 Aug 14]; Available from: URL: [www.medicinescomplete.com](http://www.medicinescomplete.com)
  11. Summary of product characteristics; Dexamethasone Tablets BP 2.0mg. *www mhra.gov.uk* 2012 November 13 [cited 2013 Aug 14]; Available from: URL: <http://www.mhra.gov.uk/home/groups/spcpil/documents/spcpil/con1369200053458.pdf>
  12. Summary of product characteristics; Prednisolone 5mg Tablets. *www mhra.gov.uk* 2011 July 5 [cited 2013 Aug 14]; Available from: URL: <http://www.mhra.gov.uk/home/groups/spcpil/documents/spcpil/con1364186684018.pdf>
  13. Gold Standard, Inc. Prednisone. *Clinical Pharmacology* 2012 September 8 [cited 2013 Oct 11]; Available from: URL: <http://www.clinicalpharmacology.com>
  14. Martinek J, Hlavova K, Zavada F, Seifert B, Rejchrt S, Urban O, et al. "A surviving myth"--corticosteroids are still considered ulcerogenic by a majority of physicians. *Scand J Gastroenterol* 2010;45: 1156-61.
  15. Heidelbaugh JJ, Inadomi JM. Magnitude and economic impact of inappropriate use of stress ulcer prophylaxis in non-ICU hospitalized patients. *Am J Gastroenterol* 2006;101: 2200-5.
  16. Zink DA, Pohlman M, Barnes M, Cannon ME. Long-term use of acid suppression started inappropriately during hospitalization. *Aliment Pharmacol Ther* 2005;21: 1203-9.
  17. Munson JC, Wahl PM, Daniel G, Kimmel SE, Hennessy S. Factors associated with the initiation of proton pump inhibitors in corticosteroid users. *Pharmacoepidemiol Drug Saf* 2012;21: 366-74.

18. van der Goes MC, Jacobs JW, Boers M, Andrews T, Blom-Bakkers MA, Buttgerit F, et al. Monitoring adverse events of low-dose glucocorticoid therapy: EULAR recommendations for clinical trials and daily practice. *Ann Rheum Dis* 2010;69: 1913-9.
19. Ahsberg K, Ye W, Lu Y, Zheng Z, Stael von HC. Hospitalisation of and mortality from bleeding peptic ulcer in Sweden: a nationwide time-trend analysis. *Aliment Pharmacol Ther* 2011;33: 578-84.
20. Lanas A, Garcia-Rodriguez LA, Polo-Tomas M, Ponce M, Quintero E, Perez-Aisa MA, et al. The changing face of hospitalisation due to gastrointestinal bleeding and perforation. *Aliment Pharmacol Ther* 2011;33: 585-91.
21. Juni P, Witschi A, Bloch R, Egger M. The hazards of scoring the quality of clinical trials for meta-analysis. *JAMA* 1999;282: 1054-60.
22. Alderson P, Roberts I. Corticosteroids for acute traumatic brain injury. *Cochrane Database Syst Rev* 2005; CD000196.
23. Brouwer MC, McIntyre P, de GJ, Prasad K, van de Beek D. Corticosteroids for acute bacterial meningitis. *Cochrane Database Syst Rev* 2010; CD004405.
24. Halliday HL, Ehrenkranz RA, Doyle LW. Late (>7 days) postnatal corticosteroids for chronic lung disease in preterm infants. *Cochrane Database Syst Rev* 2009; CD001145.
25. Halliday HL, Ehrenkranz RA, Doyle LW. Early (< 8 days) postnatal corticosteroids for preventing chronic lung disease in preterm infants. *Cochrane Database Syst Rev* 2010; CD001146.
26. Stollman N, Metz DC. Pathophysiology and prophylaxis of stress ulcer in intensive care unit patients. *J Crit Care* 2005;20: 35-45.
27. Cook DJ, Fuller HD, Guyatt GH, Marshall JC, Leasa D, Hall R, et al. Risk factors for gastrointestinal bleeding in critically ill patients. Canadian Critical Care Trials Group. *N Engl J Med* 1994;330: 377-81.

1  
2  
3  
4  
5  
6  
7  
8  
9  
10  
11  
12  
13  
14  
15  
16  
17  
18  
19  
20  
21  
22  
23  
24  
25  
26  
27  
28  
29  
30  
31  
32  
33  
34  
35  
36  
37  
38  
39  
40  
41  
42  
43  
44  
45  
46  
47  
48  
49  
50  
51  
52  
53  
54  
55  
56  
57  
58  
59  
60

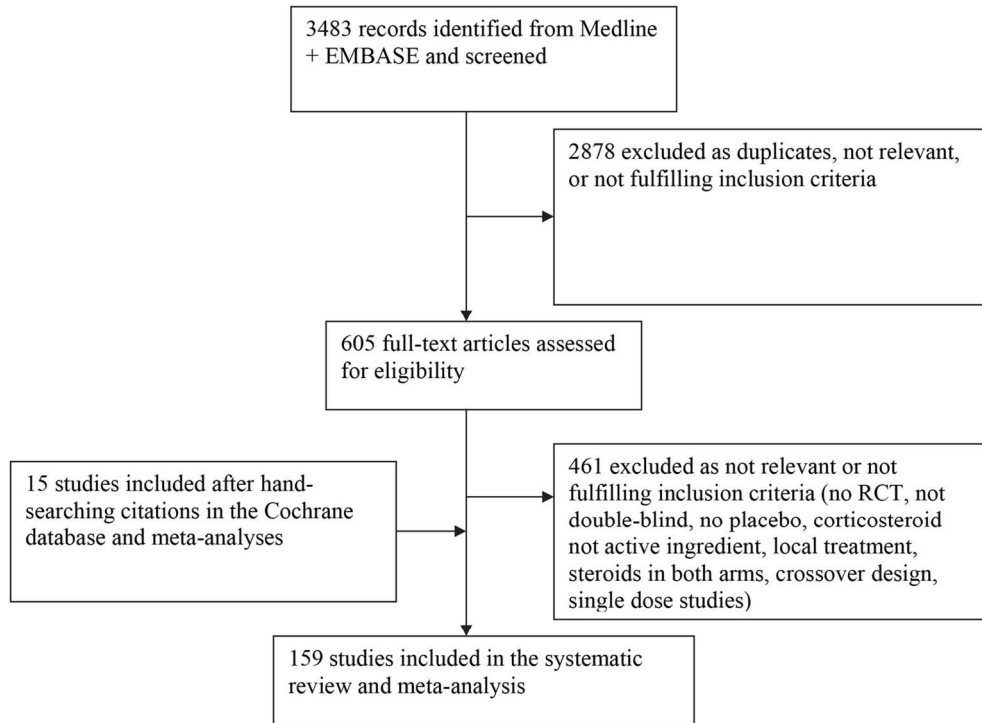

Flowchart for the selection of eligible studies  
127x93mm (300 x 300 DPI)

Review only

1  
2  
3  
4  
5  
6  
7  
8  
9  
10  
11  
12  
13  
14  
15  
16  
17  
18  
19  
20  
21  
22  
23  
24  
25  
26  
27  
28  
29  
30  
31  
32  
33  
34  
35  
36  
37  
38  
39  
40  
41  
42  
43  
44  
45  
46  
47  
48  
49  
50  
51  
52  
53  
54  
55  
56  
57  
58  
59  
60

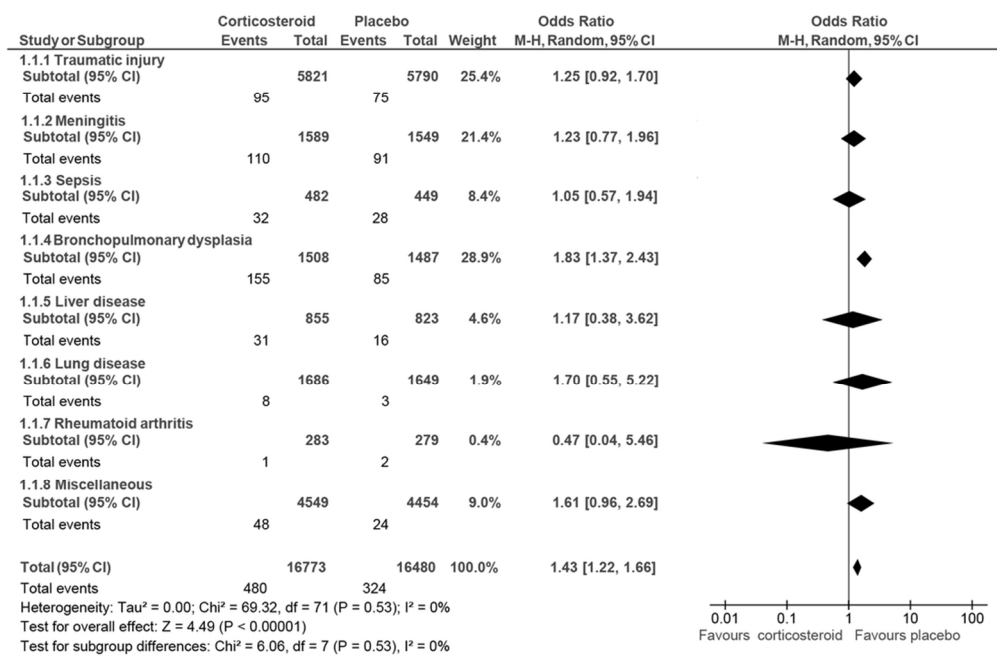

Summary of pooled results.  
 Gastrointestinal bleeding in corticosteroid users versus placebo users.  
 The Mantel-Haenszel (M-H) method with random effects model was used.  
 93x63mm (300 x 300 DPI)

1  
2  
3 Database: Ovid MEDLINE(R) <1948 to June Week 4 2011>  
4  
5 Search Strategy:  
6

7 -----  
8 1 exp Glucocorticoids/ (146604)  
9 2 exp Betamethasone/ (5732)  
10 3 exp Dexamethasone/ (40372)  
11 4 exp Methylprednisolone/ (14855)  
12 5 exp Prednisolone/ (40385)  
13 6 exp Prednisone/ (31682)  
14 7 exp Triamcinolone/ (7212)  
15 8 exp Cortisone/ (14257)  
16 9 exp Hydrocortisone/ (58105)  
17 10 2 or 3 or 4 or 5 or 6 or 7 or 8 or 9 (179048)  
18 11 limit 10 to randomized controlled trial (9881)  
19 12 limit 11 to yr="1983 -Current" (9010)  
20 13 limit 12 to humans (8801)  
21 14 double-blind.mp. (131585)  
22 15 double blind.mp. (131585)  
23 16 14 or 15 (131585)  
24 17 13 and 16 (3380)  
25 18 placebo.mp. (129874)  
26 19 17 and 18 (2158)  
27  
28  
29  
30  
31

32 \*\*\*\*\*  
33  
34  
35  
36  
37  
38  
39  
40  
41  
42  
43  
44  
45  
46  
47  
48  
49  
50  
51  
52  
53  
54  
55  
56  
57  
58  
59  
60





1.1 GI-bleeding

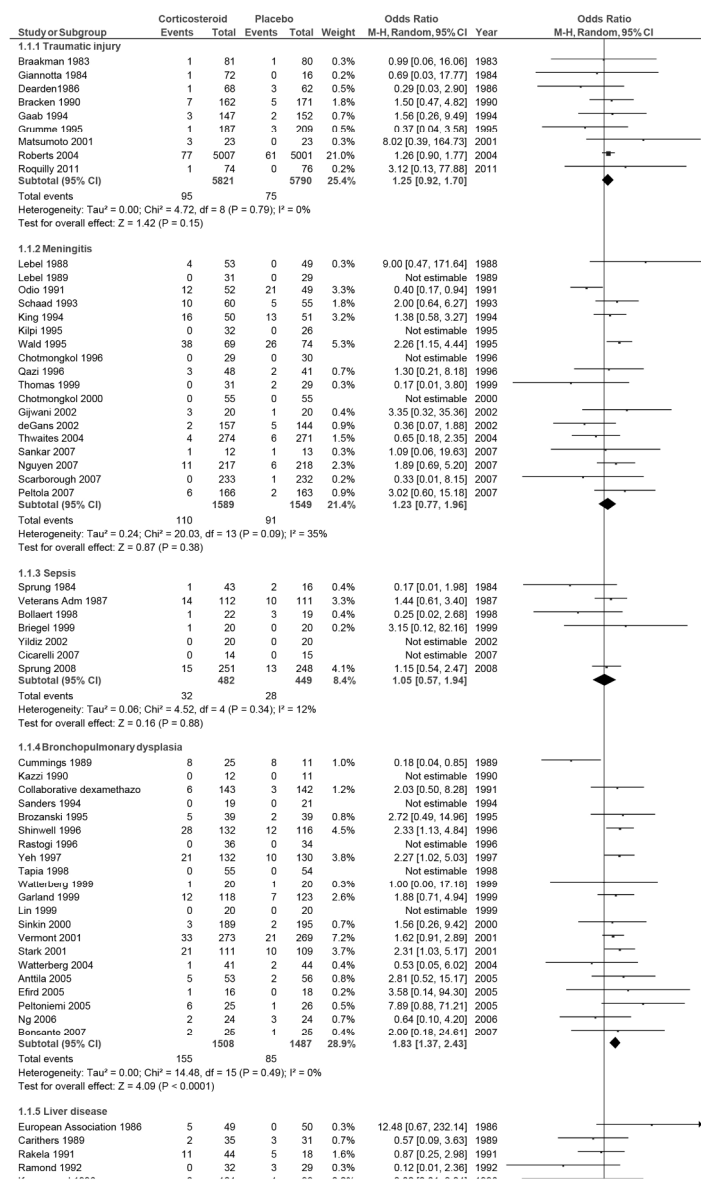

Forest plot part 1  
234x397mm (300 x 300 DPI)

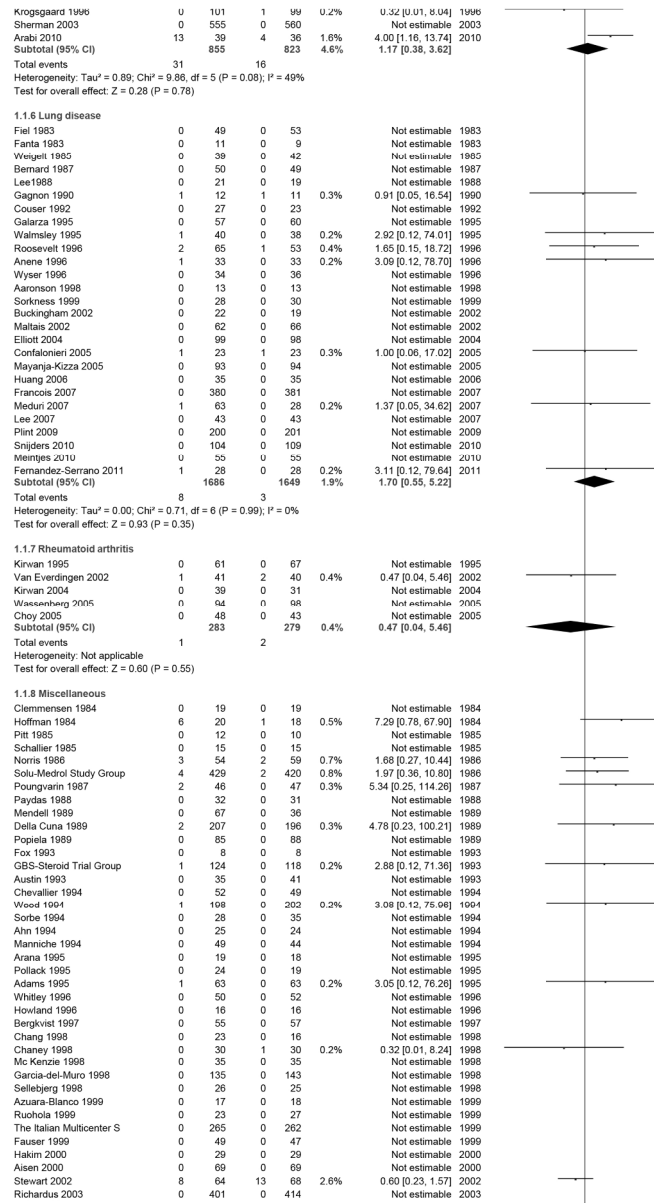

Forest plot part 2  
233x407mm (300 x 300 DPI)



1  
2  
3  
4  
5  
6  
7  
8  
9  
10  
11  
12  
13  
14  
15  
16  
17  
18  
19  
20  
21  
22  
23  
24  
25  
26  
27  
28  
29  
30  
31  
32  
33  
34  
35  
36  
37  
38  
39  
40  
41  
42  
43  
44  
45  
46  
47  
48  
49  
50  
51  
52  
53  
54  
55  
56  
57  
58  
59  
60

|                                                                                                           |     |       |     |       |        |                    |      |
|-----------------------------------------------------------------------------------------------------------|-----|-------|-----|-------|--------|--------------------|------|
| Dunlop 2003                                                                                               | 0   | 14    | 0   | 15    |        | Not estimable      | 2003 |
| Van 2004                                                                                                  | 1   | 116   | 0   | 117   | 0.2%   | 3.05 [0.12, 75.69] | 2004 |
| Buchbinder 2004                                                                                           | 0   | 24    | 0   | 26    |        | Not estimable      | 2004 |
| Ratau 2004                                                                                                | 0   | 21    | 0   | 21    |        | Not estimable      | 2004 |
| Strupp 2004                                                                                               | 1   | 35    | 0   | 38    | 0.2%   | 3.35 [0.13, 84.92] | 2004 |
| Huber 2004                                                                                                | 0   | 21    | 0   | 19    |        | Not estimable      | 2004 |
| Al-Shehri 2004                                                                                            | 0   | 15    | 0   | 15    |        | Not estimable      | 2004 |
| Prasongsukarn 2005                                                                                        | 1   | 43    | 0   | 43    | 0.2%   | 3.07 [0.12, 77.50] | 2005 |
| Ton 2005                                                                                                  | 0   | 23    | 0   | 27    |        | Not estimable      | 2005 |
| Barrilleaux 2005                                                                                          | 0   | 77    | 0   | 80    |        | Not estimable      | 2005 |
| Wong 2006                                                                                                 | 0   | 101   | 0   | 103   |        | Not estimable      | 2006 |
| Paz 2006                                                                                                  | 0   | 22    | 0   | 15    |        | Not estimable      | 2006 |
| Ronkainen 2006                                                                                            | 0   | 87    | 0   | 89    |        | Not estimable      | 2006 |
| Garg 2006                                                                                                 | 0   | 30    | 0   | 30    |        | Not estimable      | 2006 |
| Hogg 2006                                                                                                 | 0   | 33    | 0   | 31    |        | Not estimable      | 2006 |
| Hissaria 2006                                                                                             | 0   | 20    | 0   | 20    |        | Not estimable      | 2006 |
| Mat 2006                                                                                                  | 0   | 42    | 0   | 44    |        | Not estimable      | 2006 |
| Sullivan 2007                                                                                             | 0   | 138   | 0   | 141   |        | Not estimable      | 2007 |
| Boe 2007                                                                                                  | 0   | 51    | 0   | 51    |        | Not estimable      | 2007 |
| Roh 2008                                                                                                  | 0   | 23    | 0   | 22    |        | Not estimable      | 2008 |
| van Geest 2008                                                                                            | 0   | 6     | 0   | 9     |        | Not estimable      | 2008 |
| Sharafadinzadeh 2008                                                                                      | 17  | 144   | 5   | 81    | 2.2%   | 2.03 [0.72, 5.74]  | 2008 |
| Engstrom 2008                                                                                             | 0   | 213   | 0   | 209   |        | Not estimable      | 2008 |
| Sorensen 2009                                                                                             | 0   | 66    | 0   | 64    |        | Not estimable      | 2009 |
| Femiano 2010                                                                                              | 0   | 20    | 0   | 20    |        | Not estimable      | 2010 |
| Ravnborg 2010                                                                                             | 0   | 172   | 0   | 169   |        | Not estimable      | 2010 |
| Fiesseler 2011                                                                                            | 0   | 94    | 0   | 87    |        | Not estimable      | 2011 |
| Subtotal (95% CI)                                                                                         |     | 4549  |     | 4454  | 9.0%   | 1.61 [0.96, 2.69]  |      |
| Total events                                                                                              | 48  |       | 24  |       |        |                    |      |
| Heterogeneity: Tau <sup>2</sup> = 0.00; Chi <sup>2</sup> = 9.04, df = 13 (P = 0.77); I <sup>2</sup> = 0%  |     |       |     |       |        |                    |      |
| Test for overall effect: Z = 1.81 (P = 0.07)                                                              |     |       |     |       |        |                    |      |
| Total (95% CI)                                                                                            |     | 16773 |     | 16480 | 100.0% | 1.43 [1.22, 1.66]  |      |
| Total events                                                                                              | 480 |       | 324 |       |        |                    |      |
| Heterogeneity: Tau <sup>2</sup> = 0.00; Chi <sup>2</sup> = 69.32, df = 71 (P = 0.53); I <sup>2</sup> = 0% |     |       |     |       |        |                    |      |
| Test for overall effect: Z = 4.49 (P < 0.00001)                                                           |     |       |     |       |        |                    |      |
| Test for subgroup differences: Chi <sup>2</sup> = 6.06, df = 7 (P = 0.53), I <sup>2</sup> = 0%            |     |       |     |       |        |                    |      |

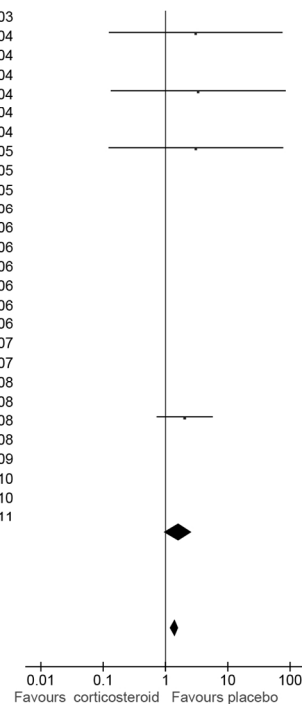

Forest plot part 3  
146x104mm (300 x 300 DPI)

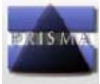

# PRISMA 2009 Checklist

| Section/topic                      | #  | Checklist item                                                                                                                                                                                                                                                                                              | Reported on page #                         |
|------------------------------------|----|-------------------------------------------------------------------------------------------------------------------------------------------------------------------------------------------------------------------------------------------------------------------------------------------------------------|--------------------------------------------|
| <b>TITLE</b>                       |    |                                                                                                                                                                                                                                                                                                             |                                            |
| Title                              | 1  | Identify the report as a systematic review, meta-analysis, or both.                                                                                                                                                                                                                                         | 1                                          |
| <b>ABSTRACT</b>                    |    |                                                                                                                                                                                                                                                                                                             |                                            |
| Structured summary                 | 2  | Provide a structured summary including, as applicable: background; objectives; data sources; study eligibility criteria, participants, and interventions; study appraisal and synthesis methods; results; limitations; conclusions and implications of key findings; systematic review registration number. | In the abstract                            |
| <b>INTRODUCTION</b>                |    |                                                                                                                                                                                                                                                                                                             |                                            |
| Rationale                          | 3  | Describe the rationale for the review in the context of what is already known.                                                                                                                                                                                                                              | 2                                          |
| Objectives                         | 4  | Provide an explicit statement of questions being addressed with reference to participants, interventions, comparisons, outcomes, and study design (PICOS).                                                                                                                                                  | 2                                          |
| <b>METHODS</b>                     |    |                                                                                                                                                                                                                                                                                                             |                                            |
| Protocol and registration          | 5  | Indicate if a review protocol exists, if and where it can be accessed (e.g., Web address), and, if available, provide registration information including registration number.                                                                                                                               | Yes, but cannot be accessed electronically |
| Eligibility criteria               | 6  | Specify study characteristics (e.g., PICOS, length of follow-up) and report characteristics (e.g., years considered, language, publication status) used as criteria for eligibility, giving rationale.                                                                                                      | 3                                          |
| Information sources                | 7  | Describe all information sources (e.g., databases with dates of coverage, contact with study authors to identify additional studies) in the search and date last searched.                                                                                                                                  | 3                                          |
| Search                             | 8  | Present full electronic search strategy for at least one database, including any limits used, such that it could be repeated.                                                                                                                                                                               | 3 + webfigure 2                            |
| Study selection                    | 9  | State the process for selecting studies (i.e., screening, eligibility, included in systematic review, and, if applicable, included in the meta-analysis).                                                                                                                                                   | 3                                          |
| Data collection process            | 10 | Describe method of data extraction from reports (e.g., piloted forms, independently, in duplicate) and any processes for obtaining and confirming data from investigators.                                                                                                                                  | 4                                          |
| Data items                         | 11 | List and define all variables for which data were sought (e.g., PICOS, funding sources) and any assumptions and simplifications made.                                                                                                                                                                       | 4                                          |
| Risk of bias in individual studies | 12 | Describe methods used for assessing risk of bias of individual studies (including specification of whether this was done at the study or outcome level), and how this information is to be used in any data synthesis.                                                                                      | 3, 4                                       |
| Summary measures                   | 13 | State the principal summary measures (e.g., risk ratio, difference in means).                                                                                                                                                                                                                               | 4                                          |



# PRISMA 2009 Checklist

1  
2  
3  
4  
5  
6  
7  
8  
9  
10  
11  
12  
13  
14  
15  
16  
17  
18  
19  
20  
21  
22  
23  
24  
25  
26  
27  
28  
29  
30  
31  
32  
33  
34  
35  
36  
37  
38  
39  
40  
41  
42  
43  
44  
45  
46  
47  
48  
49

|                      |    |                                                                                                                                                           |   |
|----------------------|----|-----------------------------------------------------------------------------------------------------------------------------------------------------------|---|
| Synthesis of results | 14 | Describe the methods of handling data and combining results of studies, if done, including measures of consistency (e.g., $I^2$ ) for each meta-analysis. | 4 |
|----------------------|----|-----------------------------------------------------------------------------------------------------------------------------------------------------------|---|

Page 1 of 2

| Section/topic                 | #  | Checklist item                                                                                                                                                                                           | Reported on page #                                            |
|-------------------------------|----|----------------------------------------------------------------------------------------------------------------------------------------------------------------------------------------------------------|---------------------------------------------------------------|
| Risk of bias across studies   | 15 | Specify any assessment of risk of bias that may affect the cumulative evidence (e.g., publication bias, selective reporting within studies).                                                             | 3                                                             |
| Additional analyses           | 16 | Describe methods of additional analyses (e.g., sensitivity or subgroup analyses, meta-regression), if done, indicating which were pre-specified.                                                         | 4                                                             |
| <b>RESULTS</b>                |    |                                                                                                                                                                                                          |                                                               |
| Study selection               | 17 | Give numbers of studies screened, assessed for eligibility, and included in the review, with reasons for exclusions at each stage, ideally with a flow diagram.                                          | 5 + fig.1                                                     |
| Study characteristics         | 18 | For each study, present characteristics for which data were extracted (e.g., study size, PICOS, follow-up period) and provide the citations.                                                             | Webfigure 1, Dataset available from the corresponding author. |
| Risk of bias within studies   | 19 | Present data on risk of bias of each study and, if available, any outcome level assessment (see item 12).                                                                                                | Dataset available from the corresponding author.              |
| Results of individual studies | 20 | For all outcomes considered (benefits or harms), present, for each study: (a) simple summary data for each intervention group (b) effect estimates and confidence intervals, ideally with a forest plot. | Fig.2 and webfigure1                                          |
| Synthesis of results          | 21 | Present results of each meta-analysis done, including confidence intervals and measures of consistency.                                                                                                  | Table 3                                                       |
| Risk of bias across studies   | 22 | Present results of any assessment of risk of bias across studies (see Item 15).                                                                                                                          | -                                                             |
| Additional analysis           | 23 | Give results of additional analyses, if done (e.g., sensitivity or subgroup analyses, meta-regression [see Item 16]).                                                                                    | Table 3                                                       |
| <b>DISCUSSION</b>             |    |                                                                                                                                                                                                          |                                                               |
| Summary of evidence           | 24 | Summarize the main findings including the strength of evidence for each main outcome; consider their relevance to key groups (e.g., healthcare providers, users, and policy makers).                     | 7                                                             |
| Limitations                   | 25 | Discuss limitations at study and outcome level (e.g., risk of bias), and at review-level (e.g., incomplete retrieval of identified research, reporting bias).                                            | 8                                                             |
| Conclusions                   | 26 | Provide a general interpretation of the results in the context of other evidence, and implications for future research.                                                                                  | 9                                                             |



## PRISMA 2009 Checklist

| FUNDING |    |                                                                                                                                            |            |
|---------|----|--------------------------------------------------------------------------------------------------------------------------------------------|------------|
| Funding | 27 | Describe sources of funding for the systematic review and other support (e.g., supply of data); role of funders for the systematic review. | No funding |

From: Moher D, Liberati A, Tetzlaff J, Altman DG, The PRISMA Group (2009). Preferred Reporting Items for Systematic Reviews and Meta-Analyses: The PRISMA Statement. PLoS Med 6(6): e1000097. doi:10.1371/journal.pmed1000097

For more information, visit: [www.prisma-statement.org](http://www.prisma-statement.org).

Page 2 of 2

For peer review only
